# Supplementary material for: Synthesis, photophysical properties and anticancer activity of micro-environment sensitive amphiphilic bile acid dendrimers
Source: Royal Society of Chemistry journal article supplement (doi:10.1039/c5ra20147k), 2016-01-01
Supplement: c5ra20147k1.pdf [file c5ra20147k1.pdf]

**Synthesis, photophysical properties and anticancer activity of micro-environment sensitive amphiphilic bile  
acid dendrimers**

Devaraj Anandkumar, Rathinam Raja and Perumal Rajakumar\*

Department of Organic Chemistry, University of Madras, Maraimalai Campus  
Chennai 600 025, TamilNadu, India

\*Corresponding author: E-mail: perumalrajakumar@gmail.com; Fax: +91 044 22300488;  
Tel: +91 044 22351269 ext. 213

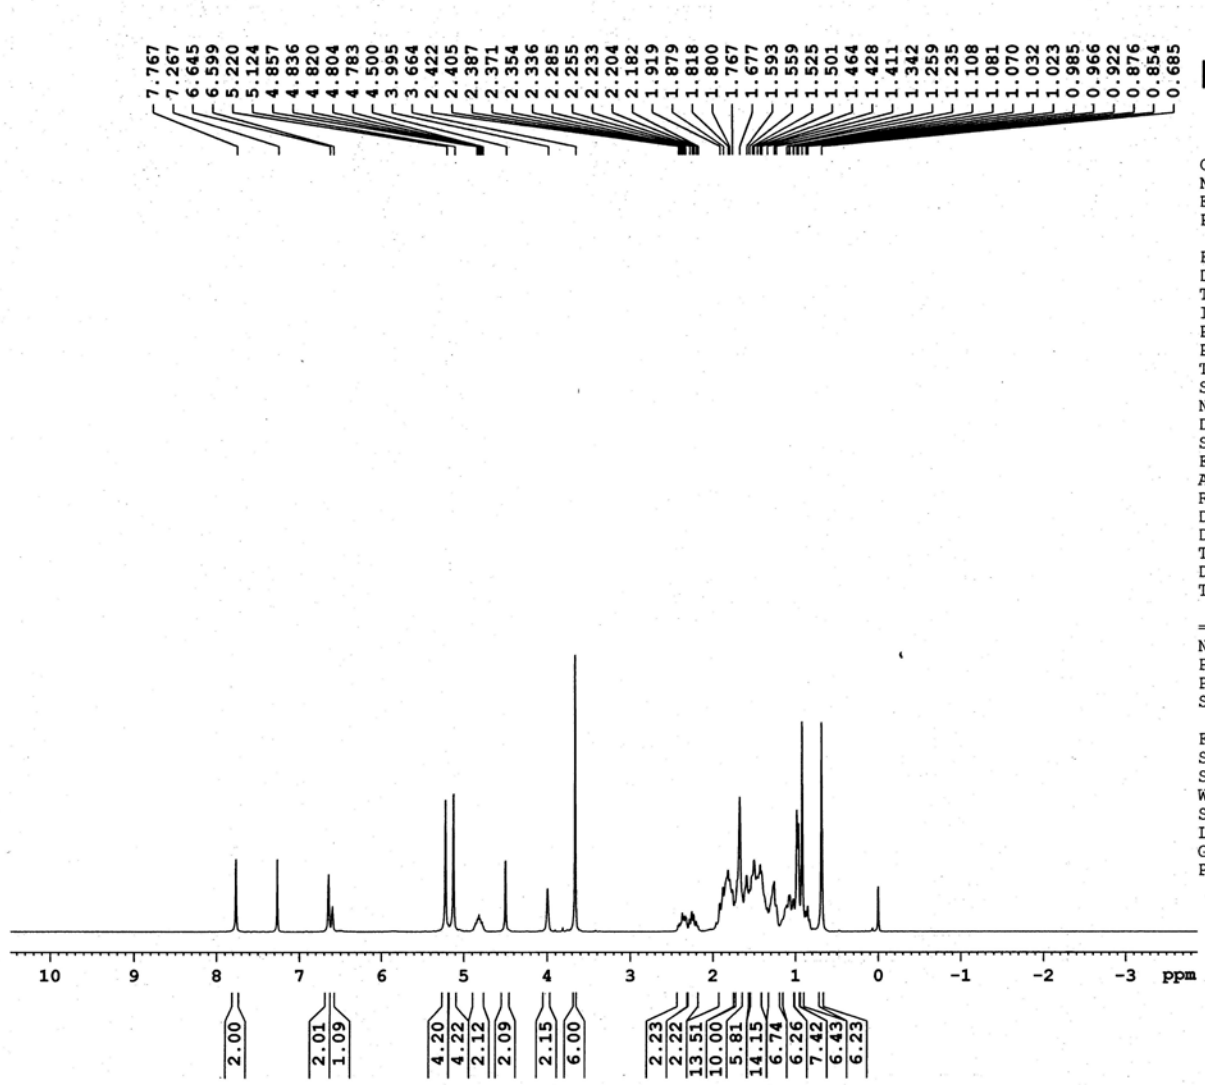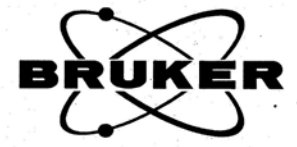

Current Data Parameters  
 NAME DA-364  
 EXPNO 3  
 PROCNO 1

F2 - Acquisition Parameters  
 Date\_ 20140809  
 Time 14.08  
 INSTRUM spect  
 PROBHD 5 mm DUL 13C-1  
 PULPROG zg30  
 TD 65536  
 SOLVENT CDCl3  
 NS 16  
 DS 2  
 SWH 6172.839 Hz  
 FIDRES 0.094190 Hz  
 AQ 5.3084660 sec  
 RG 128  
 DW 81.000 usec  
 DE 6.00 usec  
 TE 300.0 K  
 D1 1.00000000 sec  
 TD0 1

----- CHANNEL f1 -----  
 NUC1 1H  
 P1 13.15 usec  
 PL1 0.00 dB  
 SFO1 300.1318534 MHz

F2 - Processing parameters  
 SI 32768  
 SF 300.1300053 MHz  
 WDW EM  
 SSB 0  
 LB 0.30 Hz  
 GB 0  
 PC 1.00

<sup>1</sup>H NMR (300 MHz, CDCl<sub>3</sub>) of compound 14

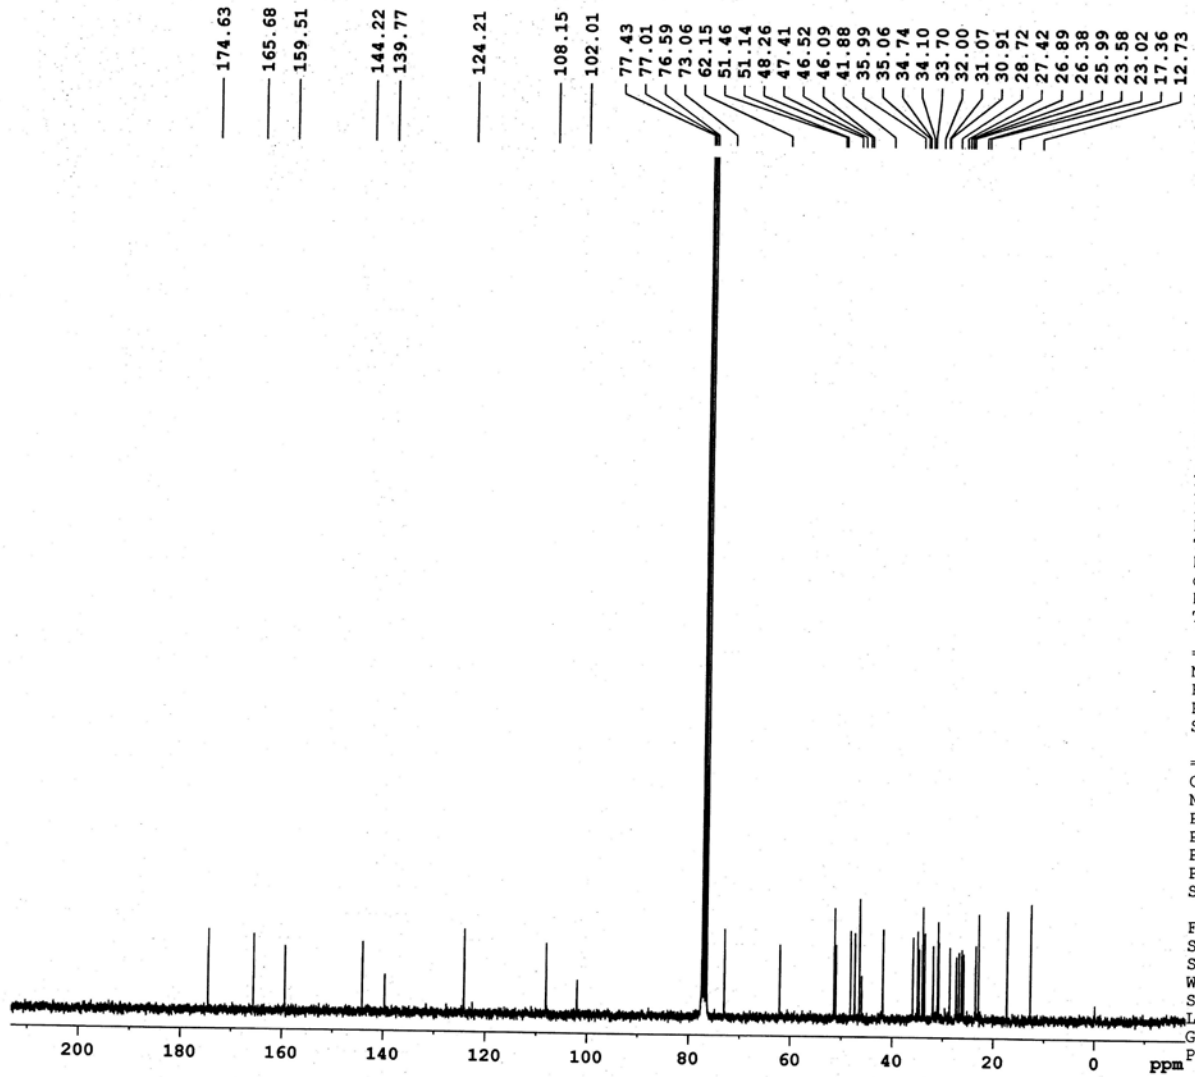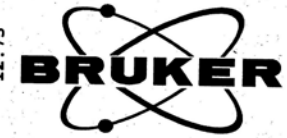

Current Data Parameters  
 NAME DA-364  
 EXPNO 2  
 PROCNO 1

F2 - Acquisition Parameters  
 Date\_ 20140809  
 Time\_ 12.54  
 INSTRUM spect  
 PROBHD 5 mm DUL 13C-1  
 PULPROG zgpg30  
 TD 65536  
 SOLVENT CDCl3  
 NS 2000  
 DS 4  
 SWH 17985.611 Hz  
 FIDRES 0.274439 Hz  
 AQ 1.8219508 sec  
 RG 456.1  
 DW 27.800 usec  
 DE 6.00 usec  
 TE 300.0 K  
 D1 2.00000000 sec  
 d11 0.03000000 sec  
 DELTA 1.89999998 sec  
 TDO 1

==== CHANNEL f1 =====  
 NUC1 13C  
 P1 9.30 usec  
 PL1 0.00 dB  
 SFO1 75.4752953 MHz

==== CHANNEL f2 =====  
 CPDPRG2 waltz16  
 NUC2 1H  
 PCPD2 80.00 usec  
 PL2 0.00 dB  
 PL12 15.68 dB  
 PL13 16.00 dB  
 SFO2 300.1312005 MHz

F2 - Processing parameters  
 SI 32768  
 SF 75.4677490 MHz  
 WDW EM  
 SSB 0  
 LB 1.00 Hz  
 GB 0  
 PC 1.40

<sup>13</sup>C NMR (75 MHz, CDCl<sub>3</sub>) of compound 14

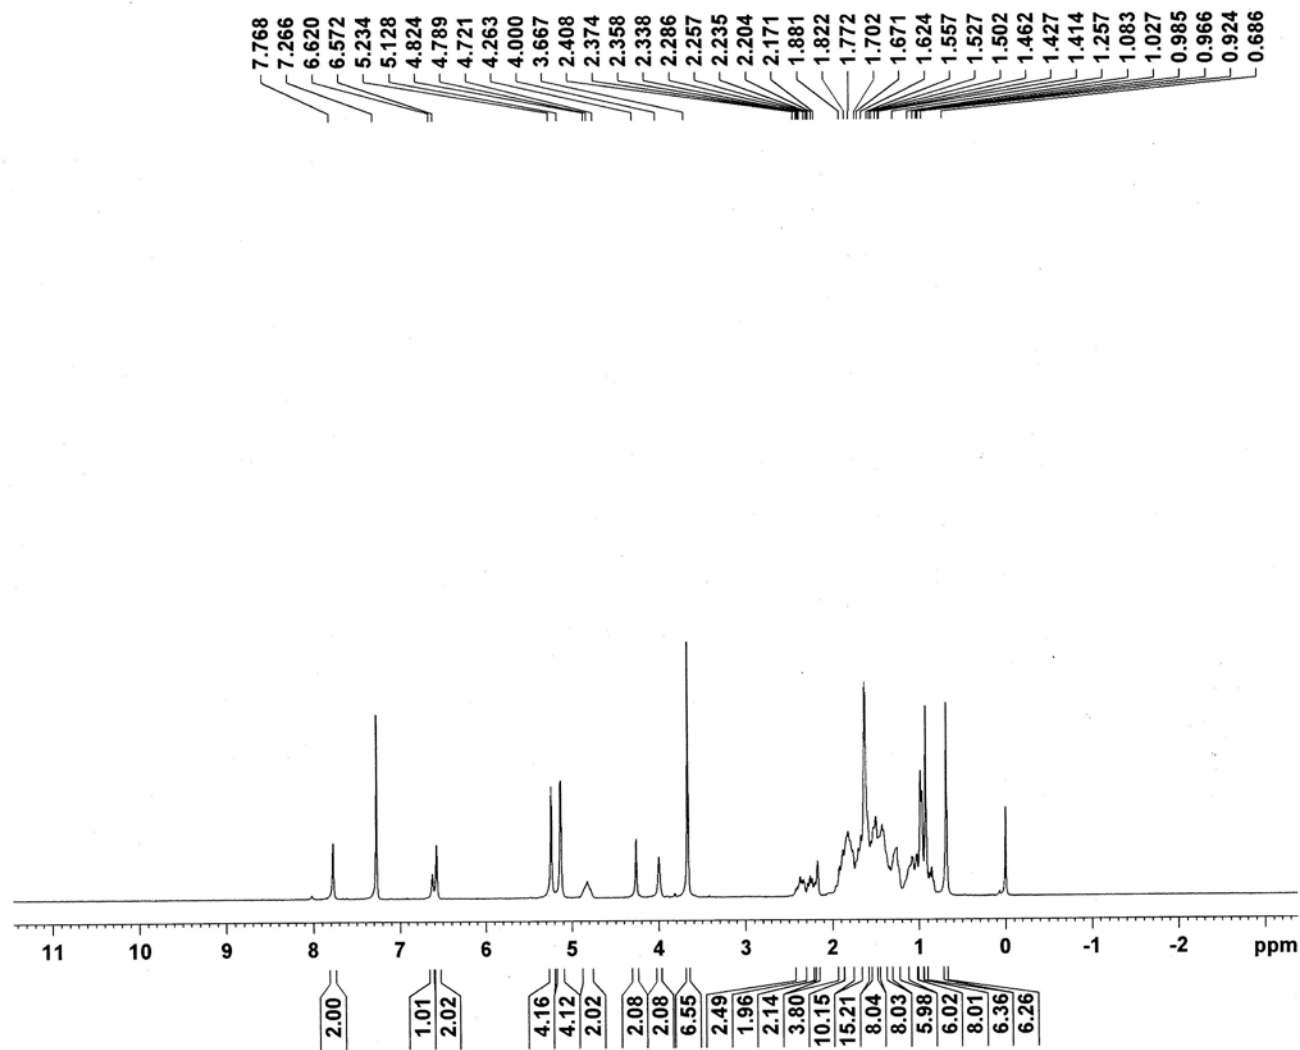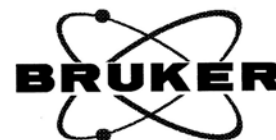

Current Data Parameters  
 NAME DA-372  
 EXPNO 1  
 PROCNO 1

F2 - Acquisition Parameters  
 Date\_ 20140815  
 Time 8.16  
 INSTRUM spect  
 PROBHD 5 mm DUL 13C-1  
 PULPROG zg30  
 TD 65536  
 SOLVENT CDCI3  
 NS 16  
 DS 2  
 SWH 6172.839 Hz  
 FIDRES 0.094190 Hz  
 AQ 5.3084660 sec  
 RG 203.2  
 DW 81.000 usec  
 DE 6.00 usec  
 TE 300.0 K  
 D1 1.00000000 sec  
 TD0 1

===== CHANNEL f1 =====  
 NUC1 1H  
 P1 13.15 usec  
 PL1 0.00 dB  
 SFO1 300.1318534 MHz

F2 - Processing parameters  
 SI 32768  
 SF 300.1300052 MHz  
 WDW EM  
 SSB 0  
 LB 0.30 Hz  
 GB 0  
 PC 1.00

<sup>1</sup>H NMR (300 MHz, CDCl<sub>3</sub>) of compound 16

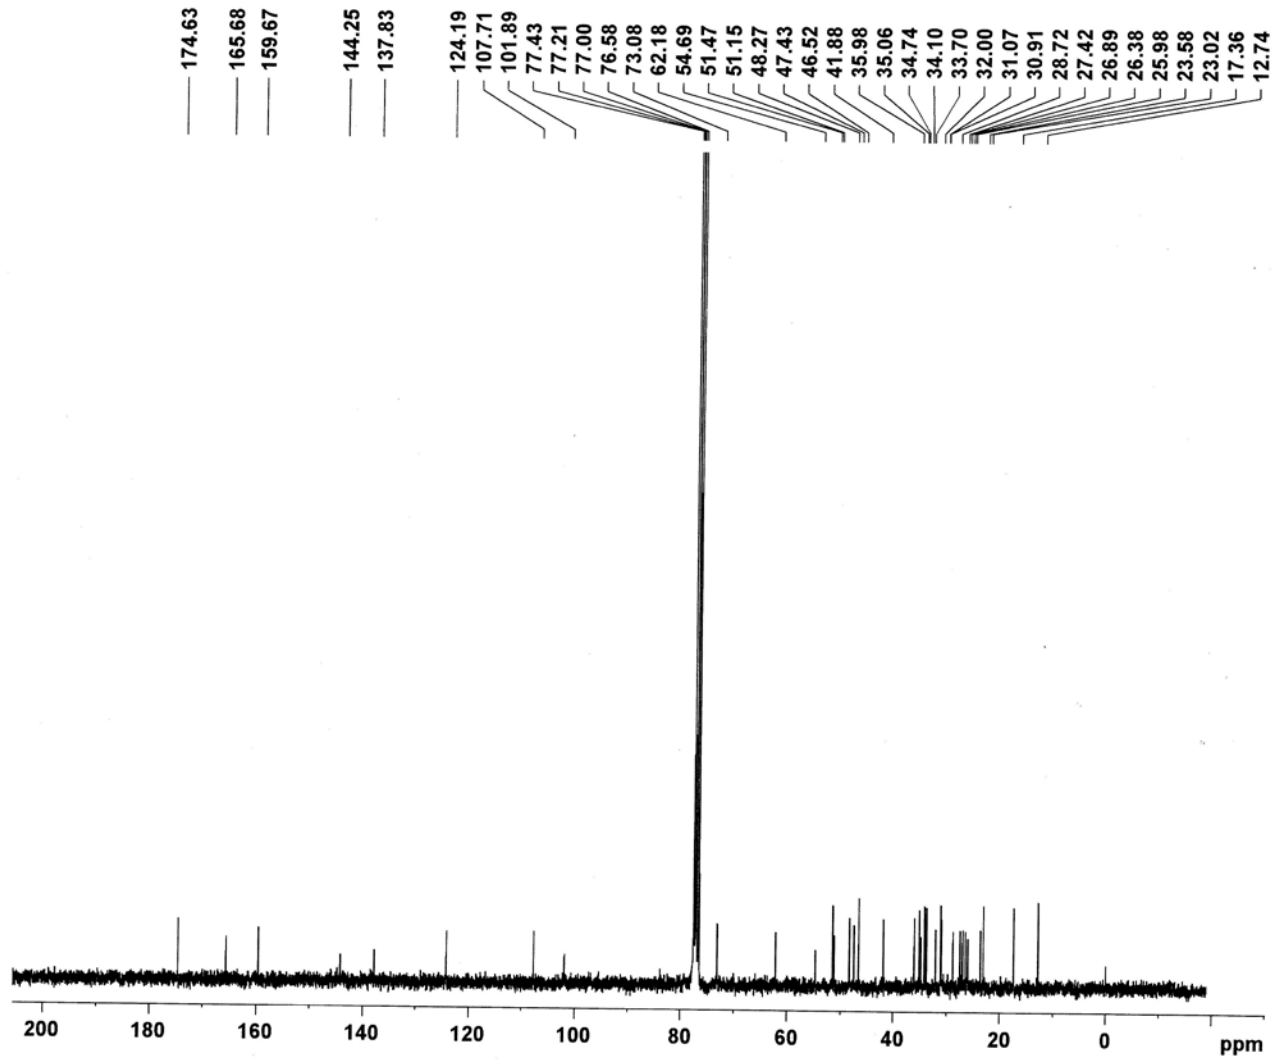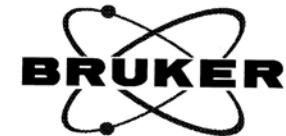

Current Data Parameters  
 NAME DA-372  
 EXPNO 3  
 PROCNO 1

F2 - Acquisition Parameters  
 Date\_ 20140815  
 Time 8.28  
 INSTRUM spect  
 PROBHD 5 mm DUL 13C-1  
 PULPROG zgpg30  
 TD 65536  
 SOLVENT CDCl3  
 NS 2193  
 DS 4  
 SWH 17985.611 Hz  
 FIDRES 0.274439 Hz  
 AQ 1.8219508 sec  
 RG 645.1  
 DW 27.800 usec  
 DE 6.00 usec  
 TE 300.0 K  
 D1 2.00000000 sec  
 d11 0.03000000 sec  
 DELTA 1.89999998 sec  
 TD0 1

===== CHANNEL f1 =====  
 NUC1 13C  
 P1 9.30 usec  
 PL1 0.00 dB  
 SFO1 75.4752953 MHz

===== CHANNEL f2 =====  
 CPDPRG2 waltz16  
 NUC2 1H  
 PCPD2 80.00 usec  
 PL2 0.00 dB  
 PL12 15.68 dB  
 PL13 16.00 dB  
 SFO2 300.1312005 MHz

F2 - Processing parameters  
 SI 32768  
 SF 75.4677490 MHz  
 WDW EM  
 SSB 0  
 LB 1.00 Hz  
 GB 0  
 PC 1.40

<sup>13</sup>C NMR (75 MHz, CDCl<sub>3</sub>) of compound **16**

UNIV OF MADRAS

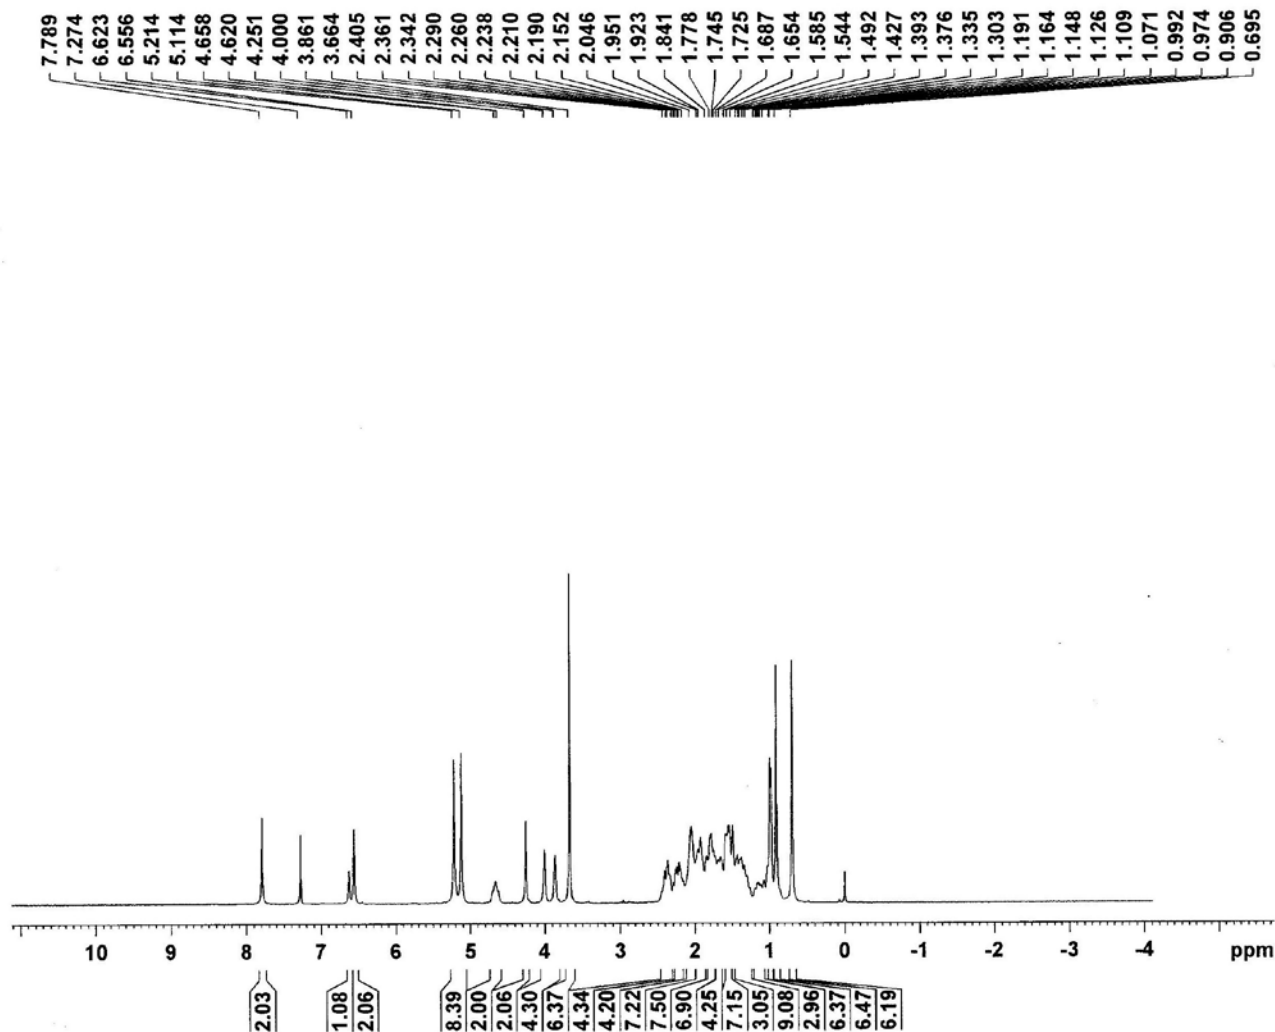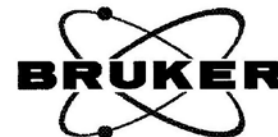

Current Data Parameters  
NAME DA-171  
EXPNO 1  
PROCNO 1

F2 - Acquisition Parameters  
Date\_ 20130727  
Time 14.23  
INSTRUM spect  
PROBHD 5 mm DUL 13C-1  
PULPROG zg30  
TD 65536  
SOLVENT CDCl3  
NS 16  
DS 2  
SWH 6172.839 Hz  
FIDRES 0.094190 Hz  
AQ 5.3084660 sec  
RG 80.6  
DW 81.000 usec  
DE 6.00 usec  
TE 300.0 K  
D1 1.00000000 sec  
TD0 1

===== CHANNEL f1 =====  
NUC1 1H  
P1 13.15 usec  
PL1 0.00 dB  
SFO1 300.1318534 MHz

F2 - Processing parameters  
SI 32768  
SF 300.1300028 MHz  
WDW EM  
SSB 0  
LB 0.30 Hz  
GB 0  
PC 1.00

<sup>1</sup>H NMR (300 MHz, CDCl<sub>3</sub>) of compound 17

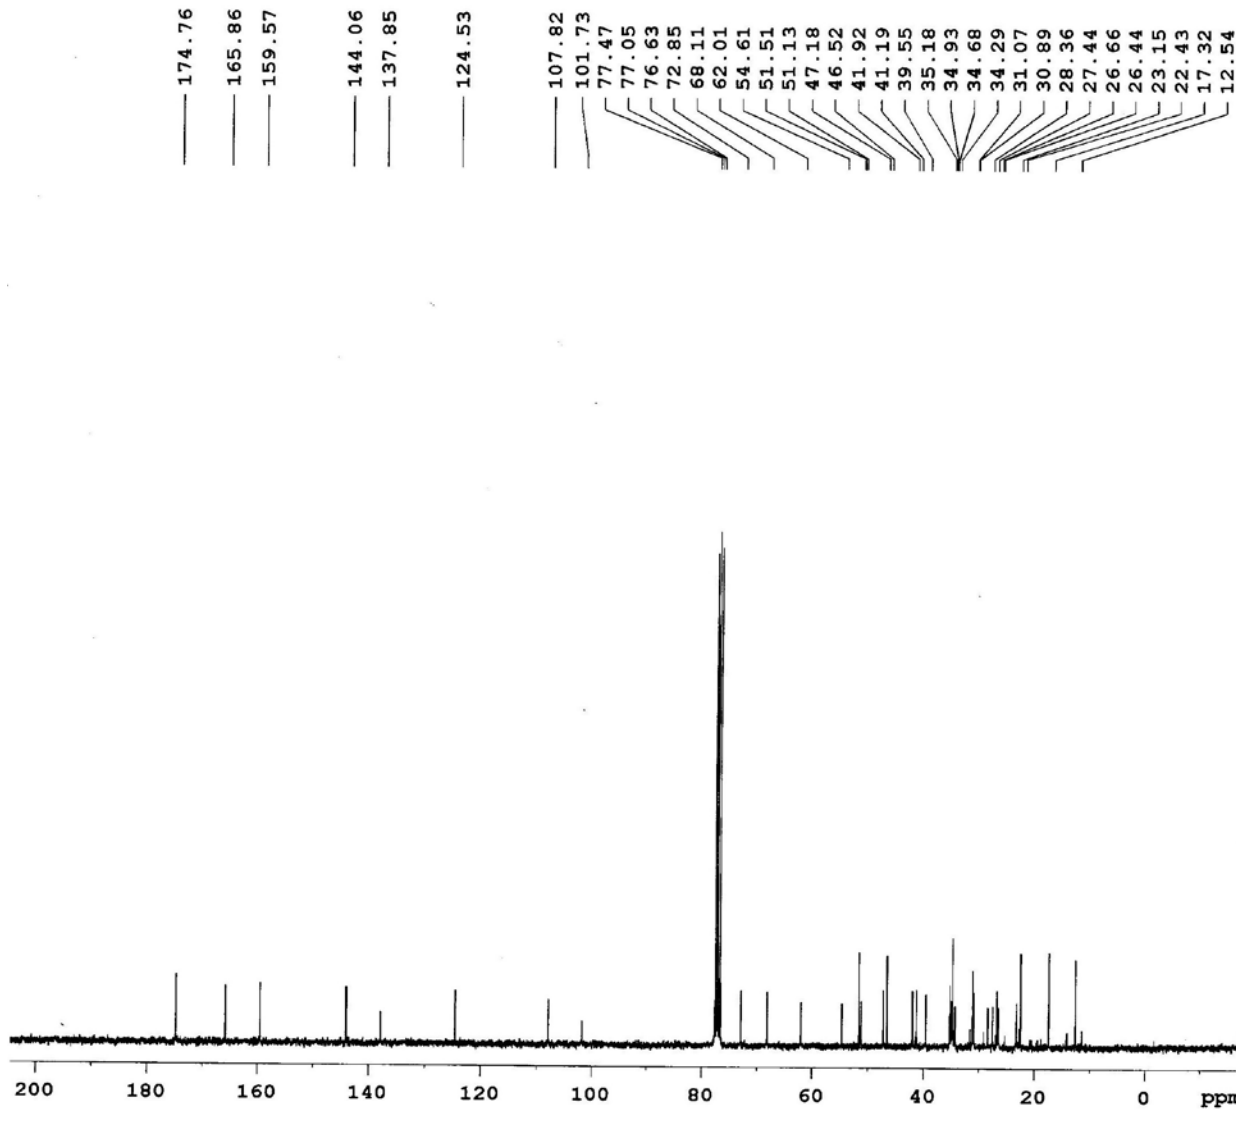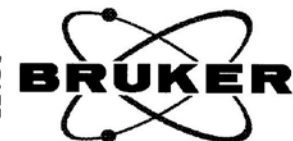

Current Data Parameters  
 NAME DA-501  
 EXPNO 4  
 PROCNO 1

F2 - Acquisition Parameters  
 Date 20150617  
 Time 18.57  
 INSTRUM spect  
 PROBHD 5 mm DUL 13C-1  
 PULPROG zgpg30  
 TD 65536  
 SOLVENT CDCl3  
 NS 621  
 DS 4  
 SWH 17985.611 Hz  
 FIDRES 0.274439 Hz  
 AQ 1.8219508 sec  
 RG 2298.8  
 DW 27.800 usec  
 DE 6.00 usec  
 TE 300.0 K  
 D1 2.0000000 sec  
 d11 0.0300000 sec  
 DELTA 1.89999998 sec  
 TD0 1

===== CHANNEL f1 =====  
 NUC1 13C  
 P1 10.38 usec  
 PL1 0.00 dB  
 SFO1 75.4752953 MHz

===== CHANNEL f2 =====  
 CPDPRG2 waltz16  
 NUC2 1H  
 PCPD2 80.00 usec  
 PL2 0.00 dB  
 PL12 15.21 dB  
 PL13 16.00 dB  
 SFO2 300.1312005 MHz

F2 - Processing parameters  
 SI 32768  
 SF 75.4677490 MHz  
 WDW EM  
 SSB 0  
 LB 1.00 Hz  
 GB 0  
 PC 1.40

<sup>13</sup>C NMR (75 MHz, CDCl<sub>3</sub>) of compound 17

7.829  
7.542  
7.276  
6.706  
6.643  
6.618  
5.453  
5.434  
5.161  
5.148  
4.978  
4.920  
4.805  
4.743  
4.482  
3.993  
3.657  
2.402  
2.368  
2.352  
2.333  
2.281  
2.252  
2.229  
2.200  
2.179  
2.024  
1.875  
1.837  
1.820  
1.790  
1.756  
1.733  
1.694  
1.631  
1.500  
1.443  
1.405  
1.340  
1.322  
1.258  
1.212  
1.157  
1.108  
1.090  
1.069  
0.990  
0.972  
0.905  
0.684

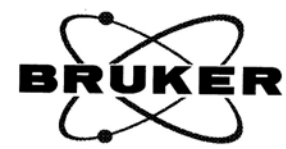

Current Data Parameters  
NAME DA-375  
EXPNO 6  
PROCNO 1

F2 - Acquisition Parameters  
Date\_ 20140822  
Time 22.54  
INSTRUM spect  
PROBHD 5 mm DUL 13C-1  
PULPROG zg30  
TD 65536  
SOLVENT CDCl3  
NS 16  
DS 2  
SWH 6172.839 Hz  
FIDRES 0.094190 Hz  
AQ 5.3084660 sec  
RG 64  
DW 81.000 usec  
DE 6.00 usec  
TE 300.0 K  
D1 1.00000000 sec  
TD0 1

===== CHANNEL f1 =====  
NUC1 1H  
P1 13.15 usec  
PL1 0.00 dB  
SFO1 300.1318534 MHz

F2 - Processing parameters  
SI 32768  
SF 300.1300028 MHz  
WDW EM  
SSB 0  
LB 0.30 Hz  
GB 0  
PC 1.00

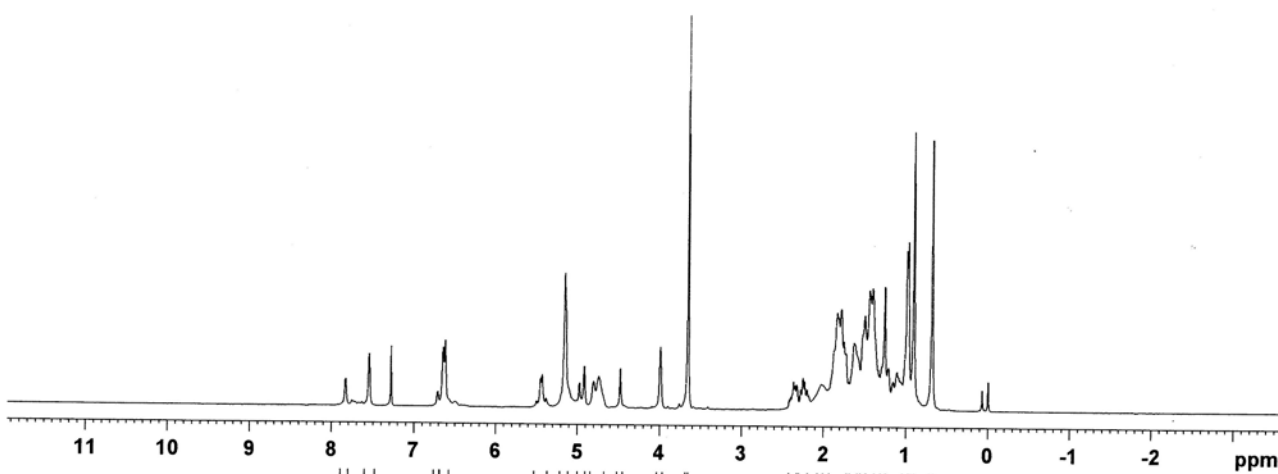

2.00  
3.79  
1.08  
8.30  
4.44  
12.83  
4.21  
8.24  
2.14  
4.30  
11.89  
4.43  
5.07  
3.96  
33.75  
12.16  
12.04  
24.38  
10.13  
15.47  
12.40  
12.36

<sup>1</sup>H NMR (300 MHz, CDCl<sub>3</sub>) of compound 18



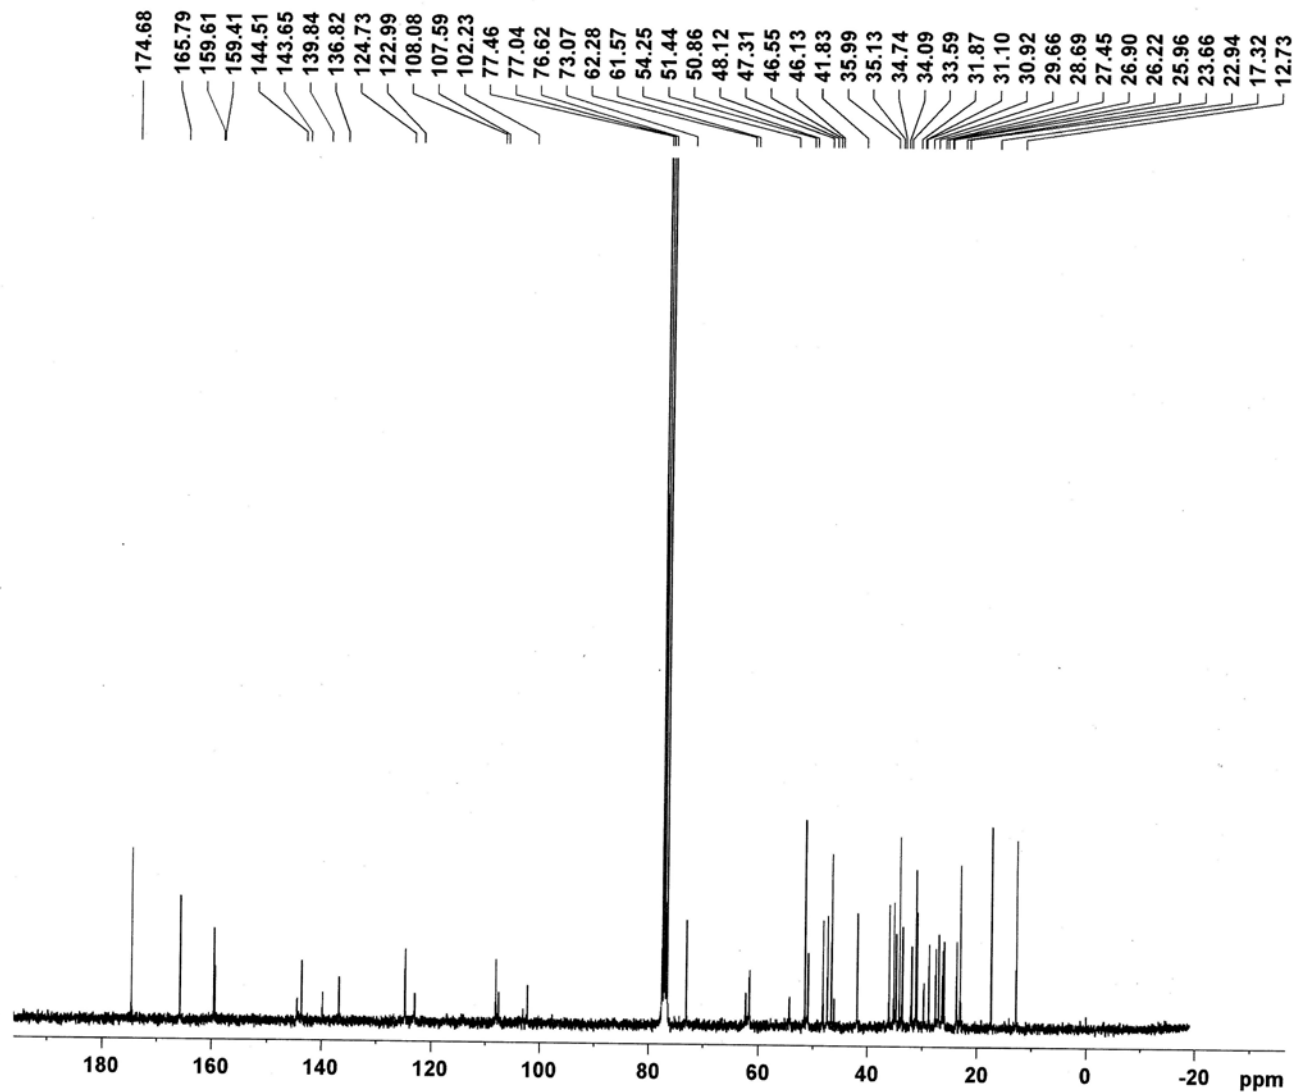

<sup>13</sup>C NMR (75 MHz, CDCl<sub>3</sub>) of compound 18

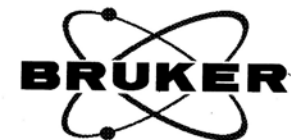

Current Data Parameters  
NAME DA-375  
EXPNO 5  
PROCNO 1

F2 - Acquisition Parameters  
Date\_ 20140822  
Time 21.58  
INSTRUM spect  
PROBHD 5 mm DUL 13C-1  
PULPROG zgpg30  
TD 65536  
SOLVENT CDCl3  
NS 2000  
DS 4  
SWH 17985.611 Hz  
FIDRES 0.274439 Hz  
AQ 1.8219508 sec  
RG 812.7  
DW 27.800 usec  
DE 6.00 usec  
TE 300.0 K  
D1 2.00000000 sec  
d11 0.03000000 sec  
DELTA 1.89999998 sec  
TD0 1

===== CHANNEL f1 =====  
NUC1 13C  
P1 9.30 usec  
PL1 0.00 dB  
SFO1 75.4752953 MHz

===== CHANNEL f2 =====  
CPDPRG2 waltz16  
NUC2 1H  
PCPD2 80.00 usec  
PL2 0.00 dB  
PL12 15.68 dB  
PL13 16.00 dB  
SFO2 300.1312005 MHz

F2 - Processing parameters  
SI 32768  
SF 75.4677490 MHz  
WDW EM  
SSB 0  
LB 1.00 Hz  
GB 0  
PC 1.40

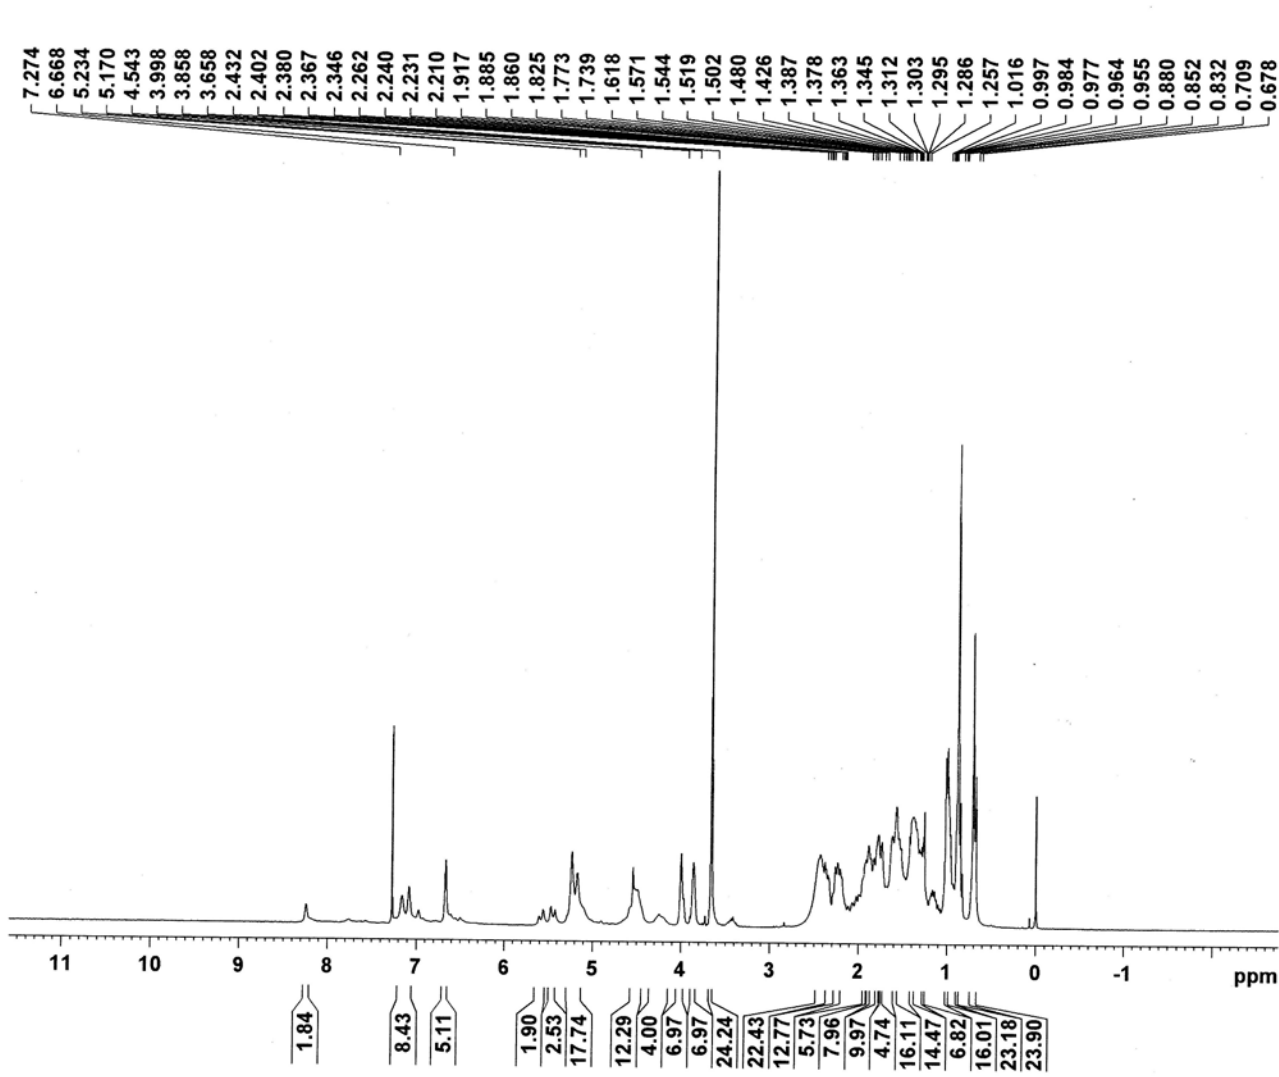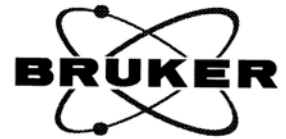

Current Data Parameters  
 NAME DA-220  
 EXPNO 3  
 PROCNO 1

F2 - Acquisition Parameters  
 Date\_ 20131123  
 Time 6.48  
 INSTRUM spect  
 PROBHD 5 mm DUL 13C-1  
 PULPROG zg30  
 TD 65536  
 SOLVENT CDCl3  
 NS 16  
 DS 2  
 SWH 6172.839 Hz  
 FIDRES 0.094190 Hz  
 AQ 5.3084660 sec  
 RG 57  
 DW 81.000 usec  
 DE 6.00 usec  
 TE 300.0 K  
 D1 1.00000000 sec  
 TD0 1

===== CHANNEL f1 =====  
 NUC1 1H  
 P1 13.15 usec  
 PL1 0.00 dB  
 SFO1 300.1318534 MHz

F2 - Processing parameters  
 SI 32768  
 SF 300.1300027 MHz  
 WDW EM  
 SSB 0  
 LB 0.30 Hz  
 GB 0  
 PC 1.00

<sup>1</sup>H NMR (300 MHz, CDCl<sub>3</sub>) of compound **19**

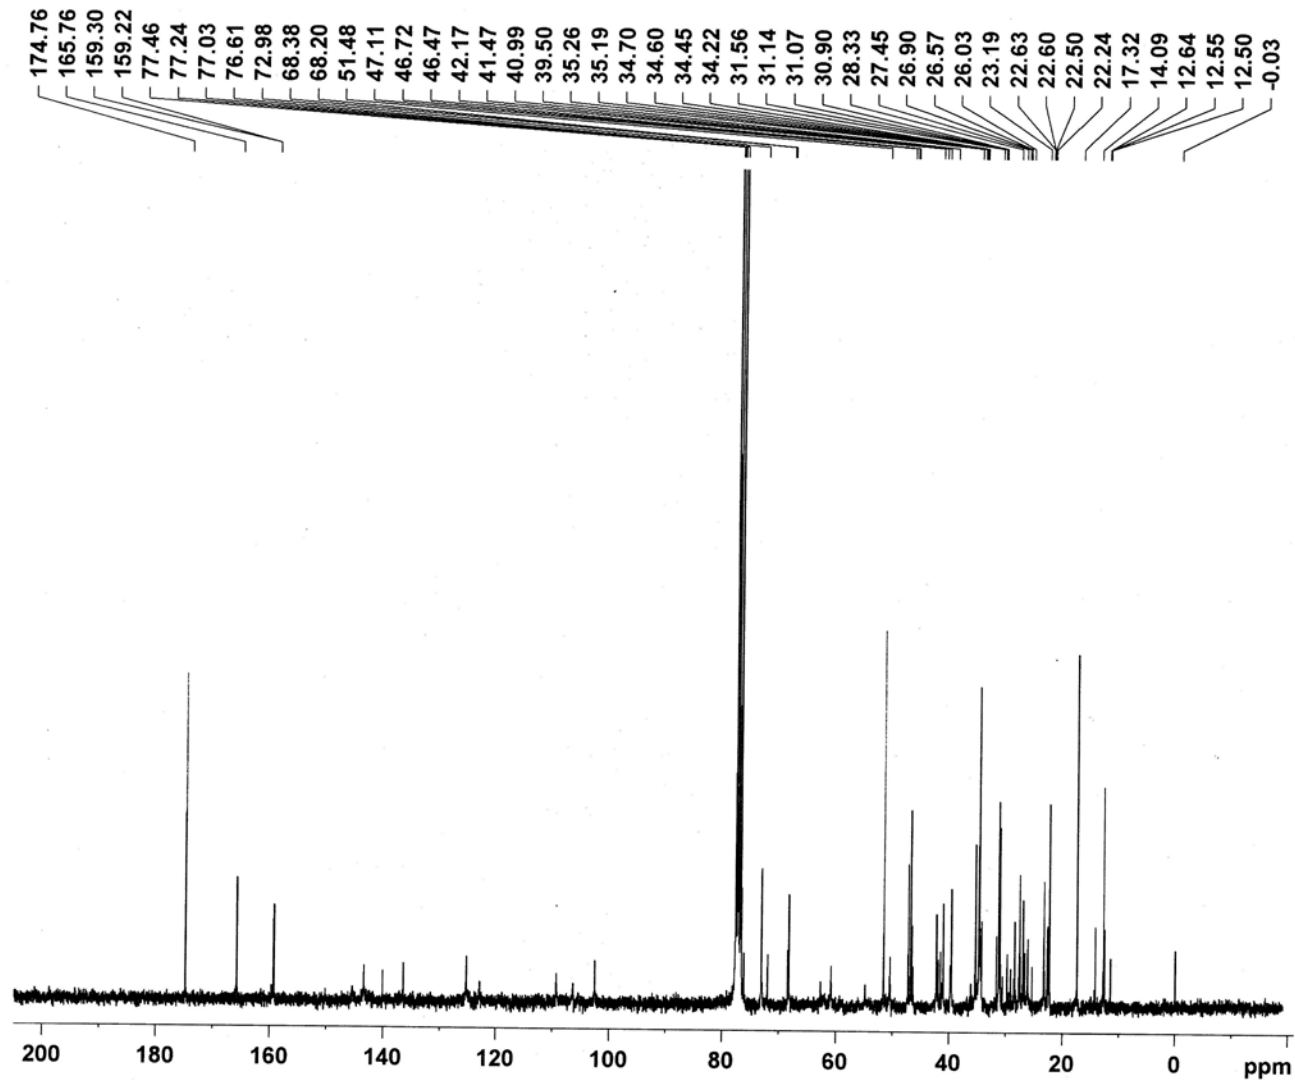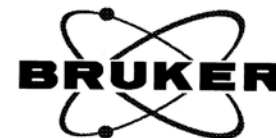

Current Data Parameters  
 NAME DA-220  
 EXPNO 2  
 PROCNO 1

F2 - Acquisition Parameters  
 Date\_ 20131122  
 Time 23.03  
 INSTRUM spect  
 PROBHD 5 mm DUL 13C-1  
 PULPROG zgpg30  
 TD 65536  
 SOLVENT CDCl3  
 NS 7171  
 DS 4  
 SWH 17985.611 Hz  
 FIDRES 0.274439 Hz  
 AQ 1.8219508 sec  
 RG 724.1  
 DW 27.800 usec  
 DE 6.00 usec  
 TE 300.0 K  
 D1 2.00000000 sec  
 d11 0.03000000 sec  
 DELTA 1.89999998 sec  
 TD0 1

===== CHANNEL f1 =====  
 NUC1 13C  
 P1 9.30 usec  
 PL1 0.00 dB  
 SFO1 75.4752953 MHz

===== CHANNEL f2 =====  
 CPDPRG2 waltz16  
 NUC2 1H  
 PCPD2 80.00 usec  
 PL2 0.00 dB  
 PL12 15.68 dB  
 PL13 16.00 dB  
 SFO2 300.1312005 MHz

F2 - Processing parameters  
 SI 32768  
 SF 75.4677490 MHz  
 WDW EM  
 SSB 0  
 LB 1.00 Hz  
 GB 0  
 PC 1.40

<sup>13</sup>C NMR (75 MHz, CDCl<sub>3</sub>) of compound **19**

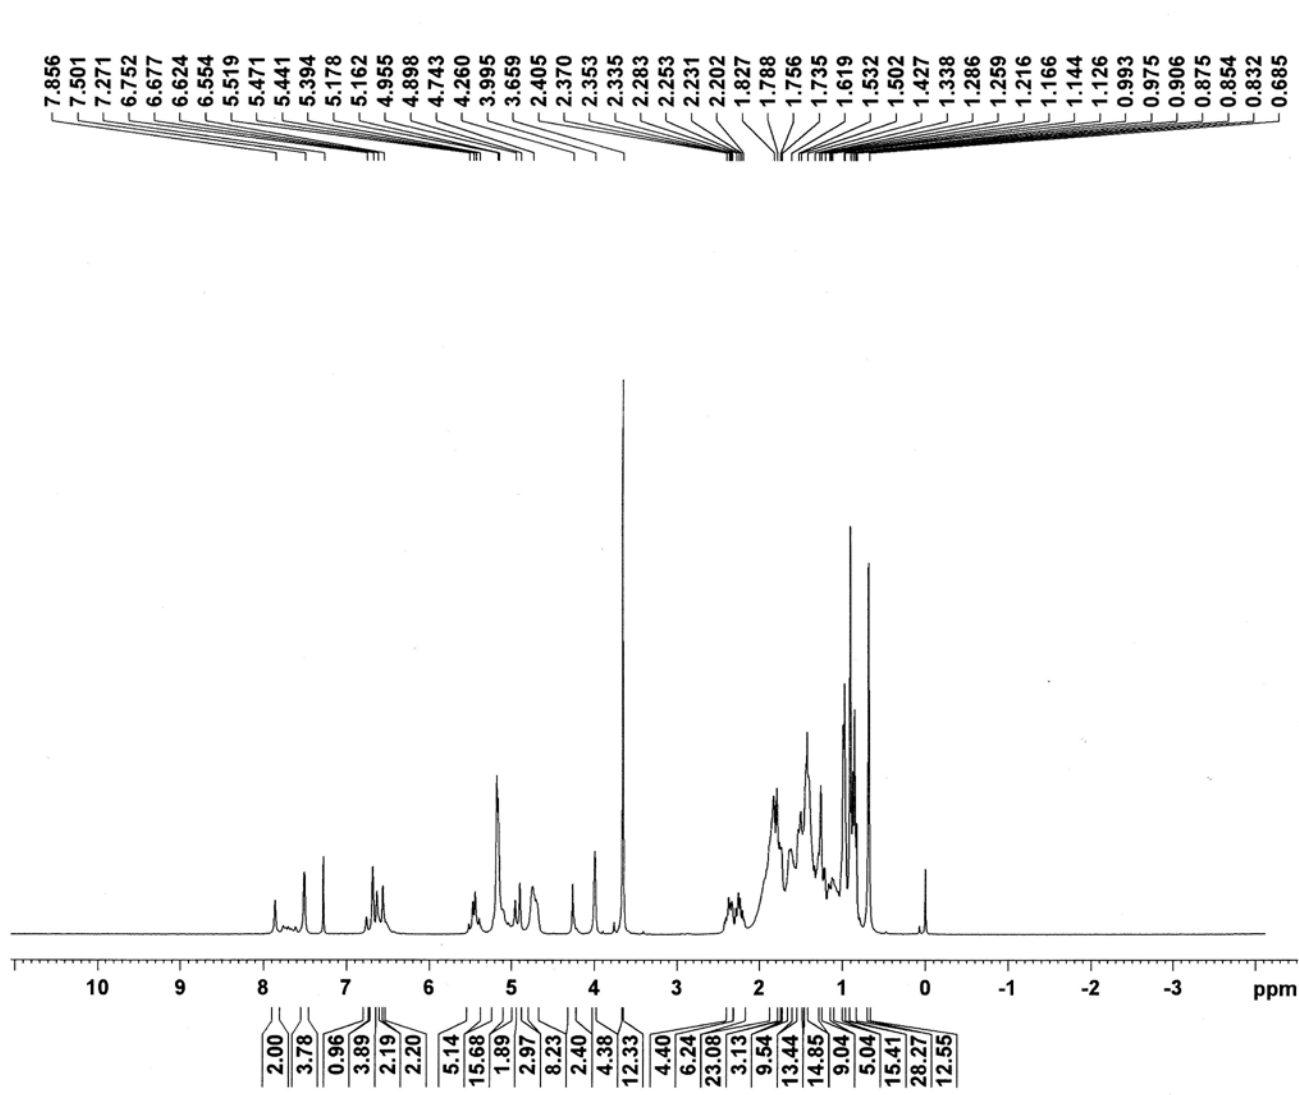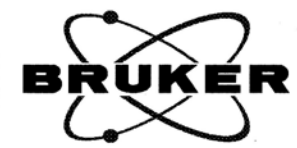

Current Data Parameters  
 NAME DA-382  
 EXPNO 3  
 PROCNO 1

F2 - Acquisition Parameters  
 Date\_ 20140921  
 Time 17.32  
 INSTRUM spect  
 PROBHD 5 mm DUL 13C-1  
 PULPROG zg30  
 TD 65536  
 SOLVENT CDCl3  
 NS 13  
 DS 2  
 SWH 6172.839 Hz  
 FIDRES 0.094190 Hz  
 AQ 5.3084660 sec  
 RG 80.6  
 DW 81.000 usec  
 DE 6.00 usec  
 TE 300.0 K  
 D1 1.00000000 sec  
 TD0 1

===== CHANNEL f1 =====  
 NUC1 1H  
 P1 13.15 usec  
 PL1 0.00 dB  
 SFO1 300.1318534 MHz

F2 - Processing parameters  
 SI 32768  
 SF 300.1300040 MHz  
 WDW EM  
 SSB 0  
 LB 0.30 Hz  
 GB 0  
 PC 1.00

<sup>1</sup>H NMR (300 MHz, CDCl<sub>3</sub>) of compound 20

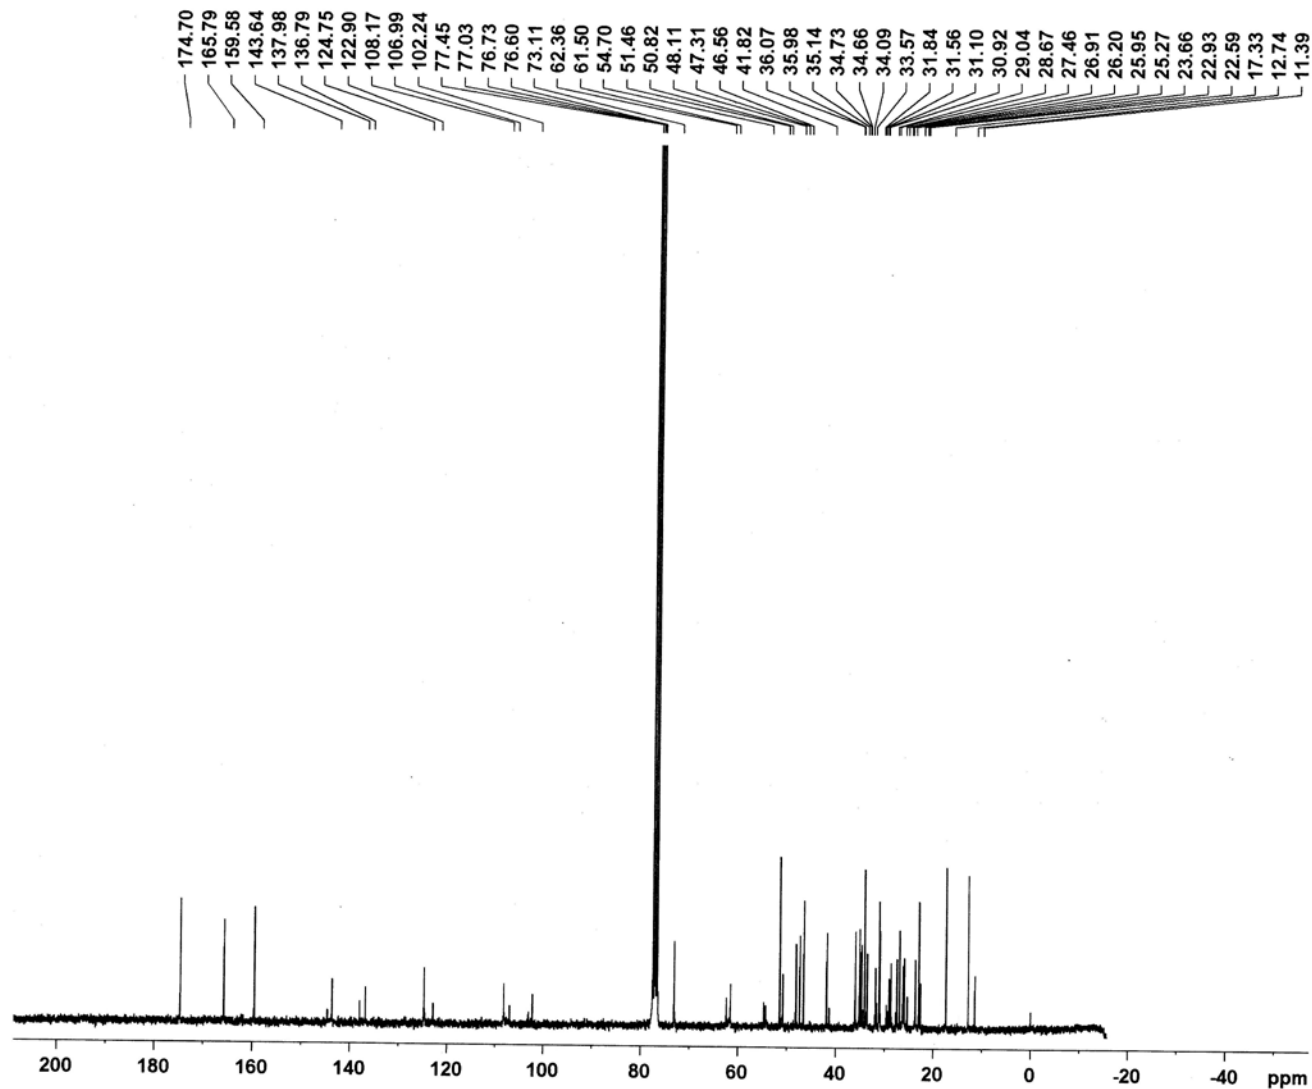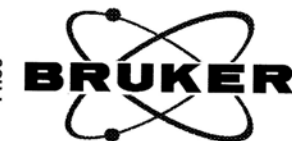

Current Data Parameters  
 NAME DA-382  
 EXPNO 2  
 PROCNO 1

F2 - Acquisition Parameters  
 Date\_ 20140921  
 Time 14.36  
 INSTRUM spect  
 PROBHD 5 mm DUL 13C-1  
 PULPROG zgpg30  
 TD 65536  
 SOLVENT CDCl3  
 NS 4478  
 DS 4  
 SWH 17985.611 Hz  
 FIDRES 0.274439 Hz  
 AQ 1.8219508 sec  
 RG 512  
 DW 27.800 usec  
 DE 6.00 usec  
 TE 300.0 K  
 D1 2.00000000 sec  
 d11 0.03000000 sec  
 DELTA 1.89999998 sec  
 TD0 1

===== CHANNEL f1 =====  
 NUC1 13C  
 P1 9.30 usec  
 PL1 0.00 dB  
 SFO1 75.4752953 MHz

===== CHANNEL f2 =====  
 CPDPRG2 waltz16  
 NUC2 1H  
 PCPD2 80.00 usec  
 PL2 0.00 dB  
 PL12 15.68 dB  
 PL13 16.00 dB  
 SFO2 300.1312005 MHz

F2 - Processing parameters  
 SI 32768  
 SF 75.4677490 MHz  
 WDW EM  
 SSB 0  
 LB 1.00 Hz  
 GB 0  
 PC 1.40

<sup>13</sup>C NMR (75 MHz, CDCl<sub>3</sub>) of compound **20**

UNIV. OF MADRAS

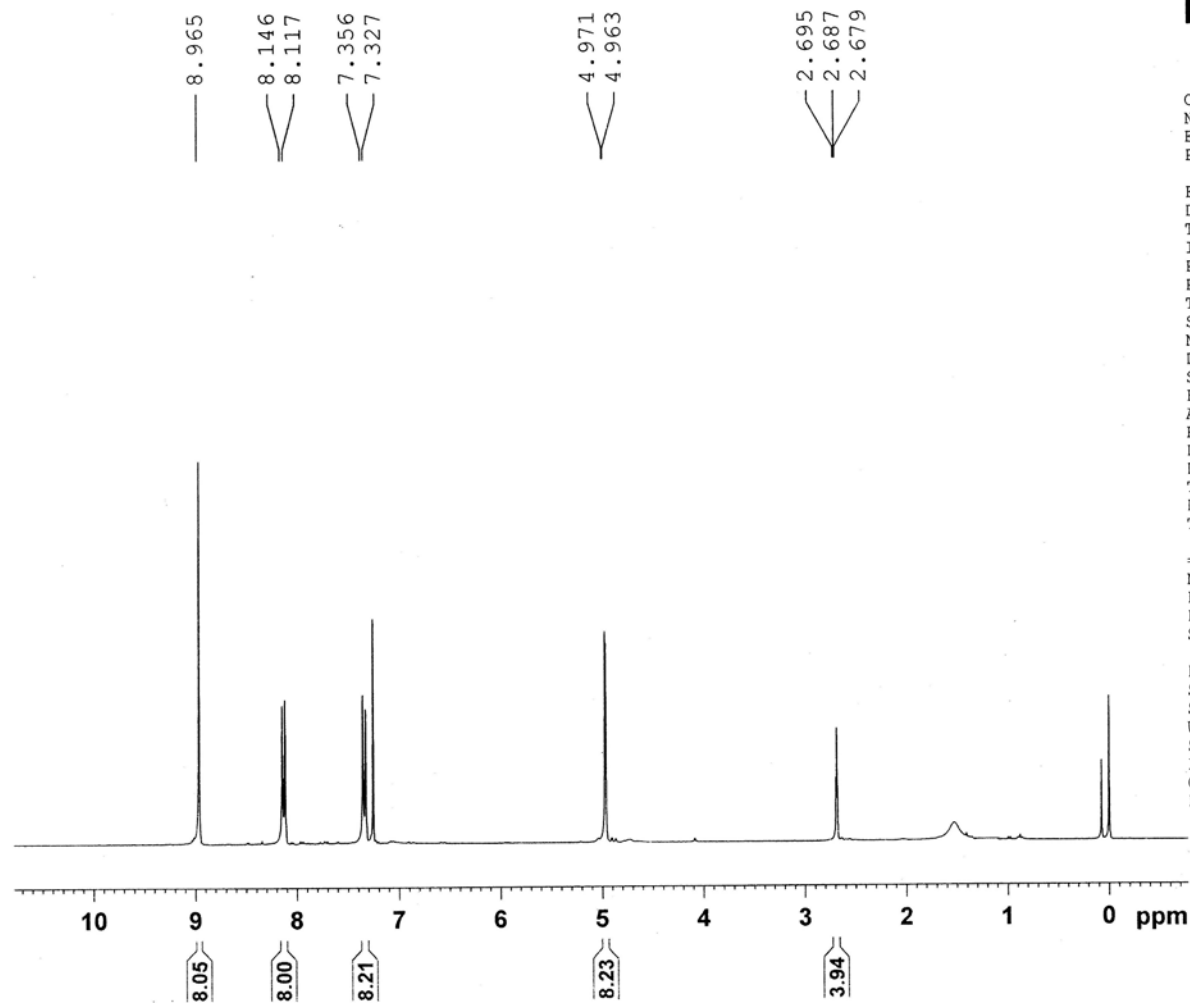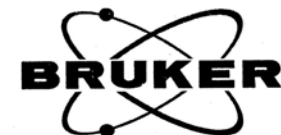

Current Data Parameters  
NAME DA-103  
EXPNO 1  
PROCNO 1

F2 - Acquisition Parameters  
Date\_ 20121128  
Time\_ 11.53  
INSTRUM spect  
PROBHD 5 mm DUL 13C-1  
PULPROG zg30  
TD 65536  
SOLVENT CDCl3  
NS 16  
DS 2  
SWH 6172.839 Hz  
FIDRES 0.094190 Hz  
AQ 5.3084660 sec  
RG 322.5  
DW 81.000 usec  
DE 6.00 usec  
TE 300.0 K  
D1 1.00000000 sec  
TD0 1

===== CHANNEL f1 =====  
NUC1 1H  
P1 13.15 usec  
PL1 0.00 dB  
SFO1 300.1318534 MHz

F2 - Processing parameters  
SI 32768  
SF 300.1300082 MHz  
WDW EM  
SSB 0  
LB 0.30 Hz  
GB 0  
PC 1.00

<sup>1</sup>H NMR (300 MHz, CDCl<sub>3</sub>) of compound **22**

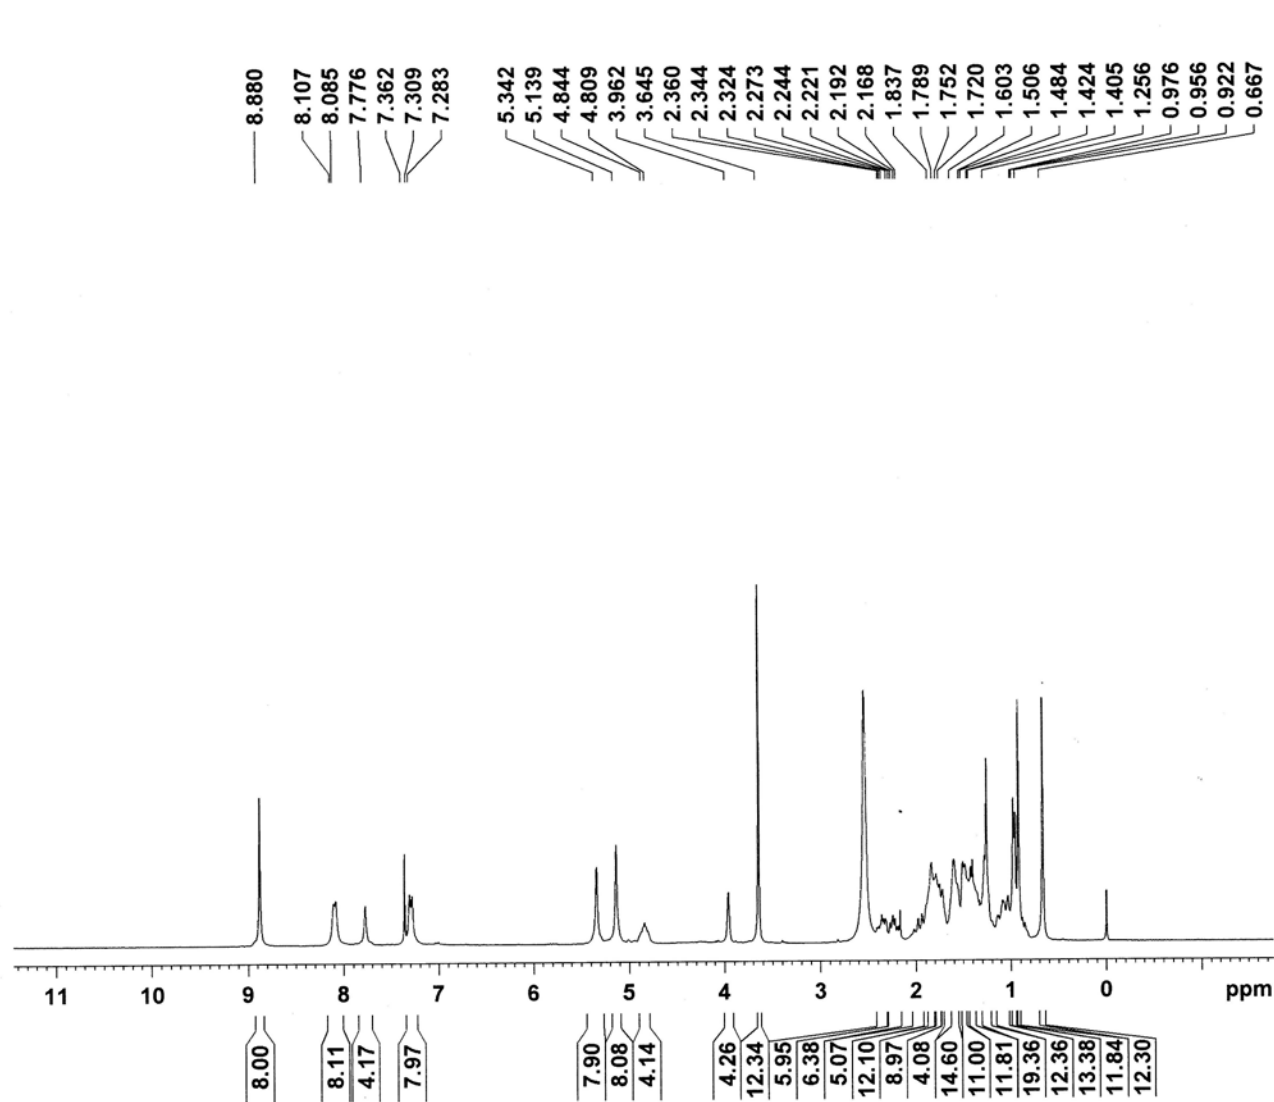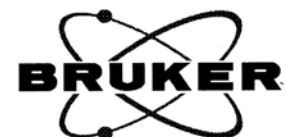

Current Data Parameters  
 NAME DA-238  
 EXPNO 4  
 PROCNO 1

F2 - Acquisition Parameters  
 Date\_ 20131231  
 Time 13.34  
 INSTRUM spect  
 PROBHD 5 mm DUL 13C-1  
 PULPROG zg30  
 TD 65536  
 SOLVENT CDCl3  
 NS 16  
 DS 2  
 SWH 6172.839 Hz  
 FIDRES 0.094190 Hz  
 AQ 5.3084660 sec  
 RG 80.6  
 DW 81.000 usec  
 DE 6.00 usec  
 TE 300.0 K  
 D1 1.00000000 sec  
 TD0 1

===== CHANNEL f1 =====  
 NUC1 1H  
 P1 13.15 usec  
 PL1 0.00 dB  
 SFO1 300.1318534 MHz

F2 - Processing parameters  
 SI 32768  
 SF 300.1299766 MHz  
 WDW EM  
 SSB 0  
 LB 0.30 Hz  
 GB 0  
 PC 1.00

<sup>1</sup>H NMR (300 MHz, CDCl<sub>3</sub> + DMSO-d<sub>6</sub>) of compound **1**

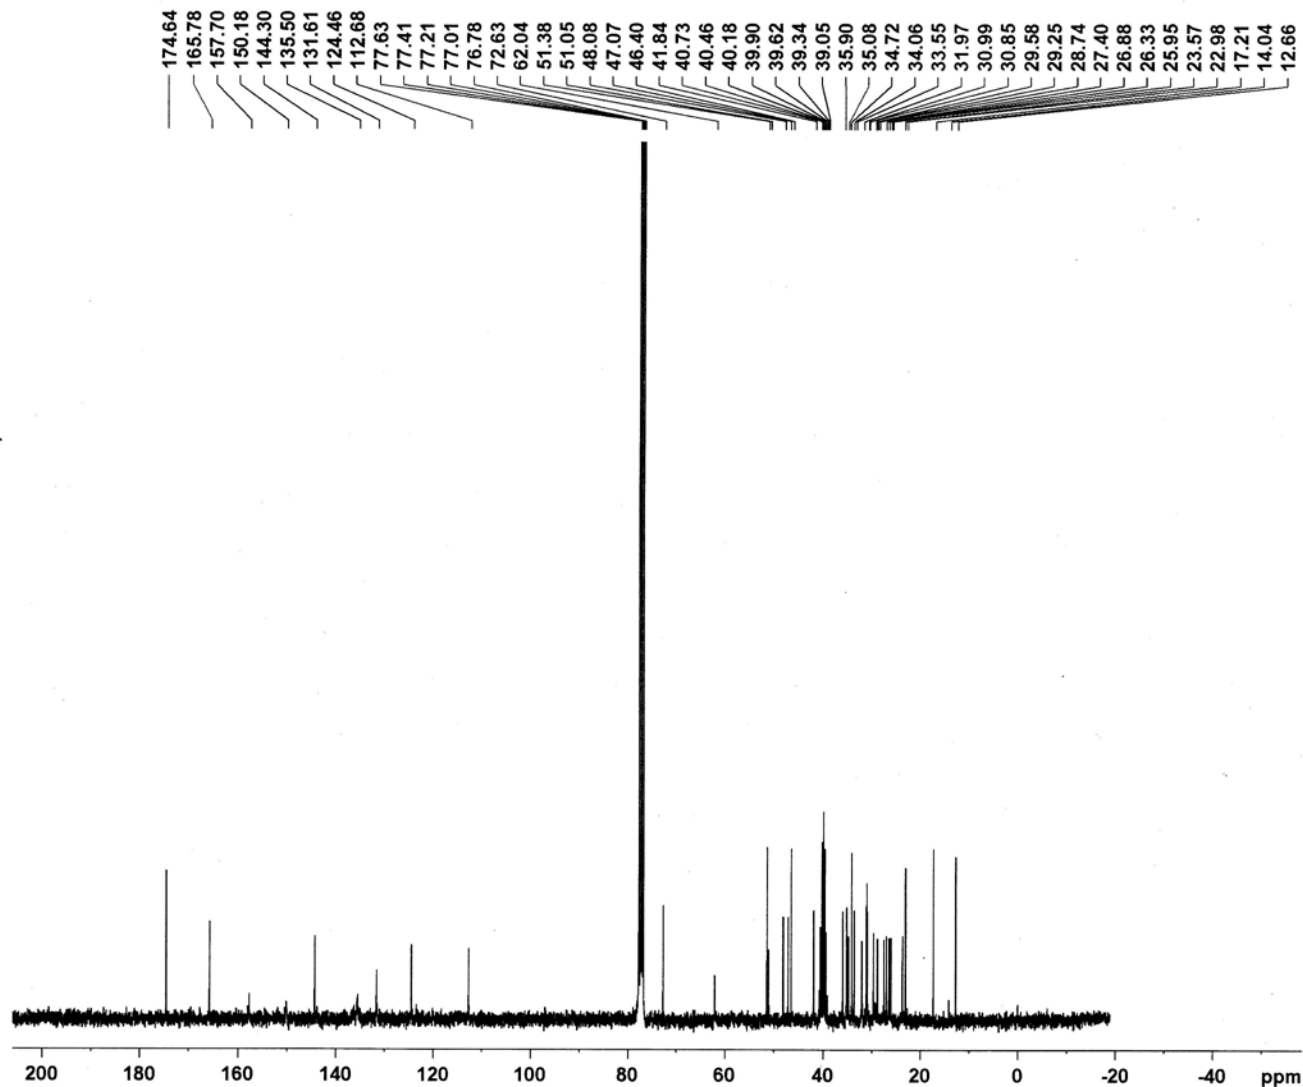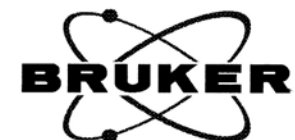

Current Data Parameters  
 NAME DA-238  
 EXPNO 5  
 PROCNO 1

F2 - Acquisition Parameters  
 Date\_ 20131231  
 Time 13.58  
 INSTRUM spect  
 PROBHD 5 mm DUL 13C-1  
 PULPROG zgpg30  
 TD 65536  
 SOLVENT CDCl3  
 NS 1803  
 DS 4  
 SWH 17985.611 Hz  
 FIDRES 0.274439 Hz  
 AQ 1.8219508 sec  
 RG 724.1  
 DW 27.800 usec  
 DE 6.00 usec  
 TE 300.0 K  
 D1 2.0000000 sec  
 d11 0.03000000 sec  
 DELTA 1.89999998 sec  
 TD0 1

===== CHANNEL f1 =====  
 NUC1 13C  
 P1 9.30 usec  
 PL1 0.00 dB  
 SFO1 75.4752953 MHz

===== CHANNEL f2 =====  
 CPDPRG2 waltz16  
 NUC2 1H  
 PCPD2 80.00 usec  
 PL2 0.00 dB  
 PL12 15.68 dB  
 PL13 16.00 dB  
 SFO2 300.1312005 MHz

F2 - Processing parameters  
 SI 32768  
 SF 75.4677490 MHz  
 WDW EM  
 SSB 0  
 LB 1.00 Hz  
 GB 0  
 PC 1.40

$^{13}\text{C}$  NMR (75 MHz,  $\text{CDCl}_3$ ) of compound **1**



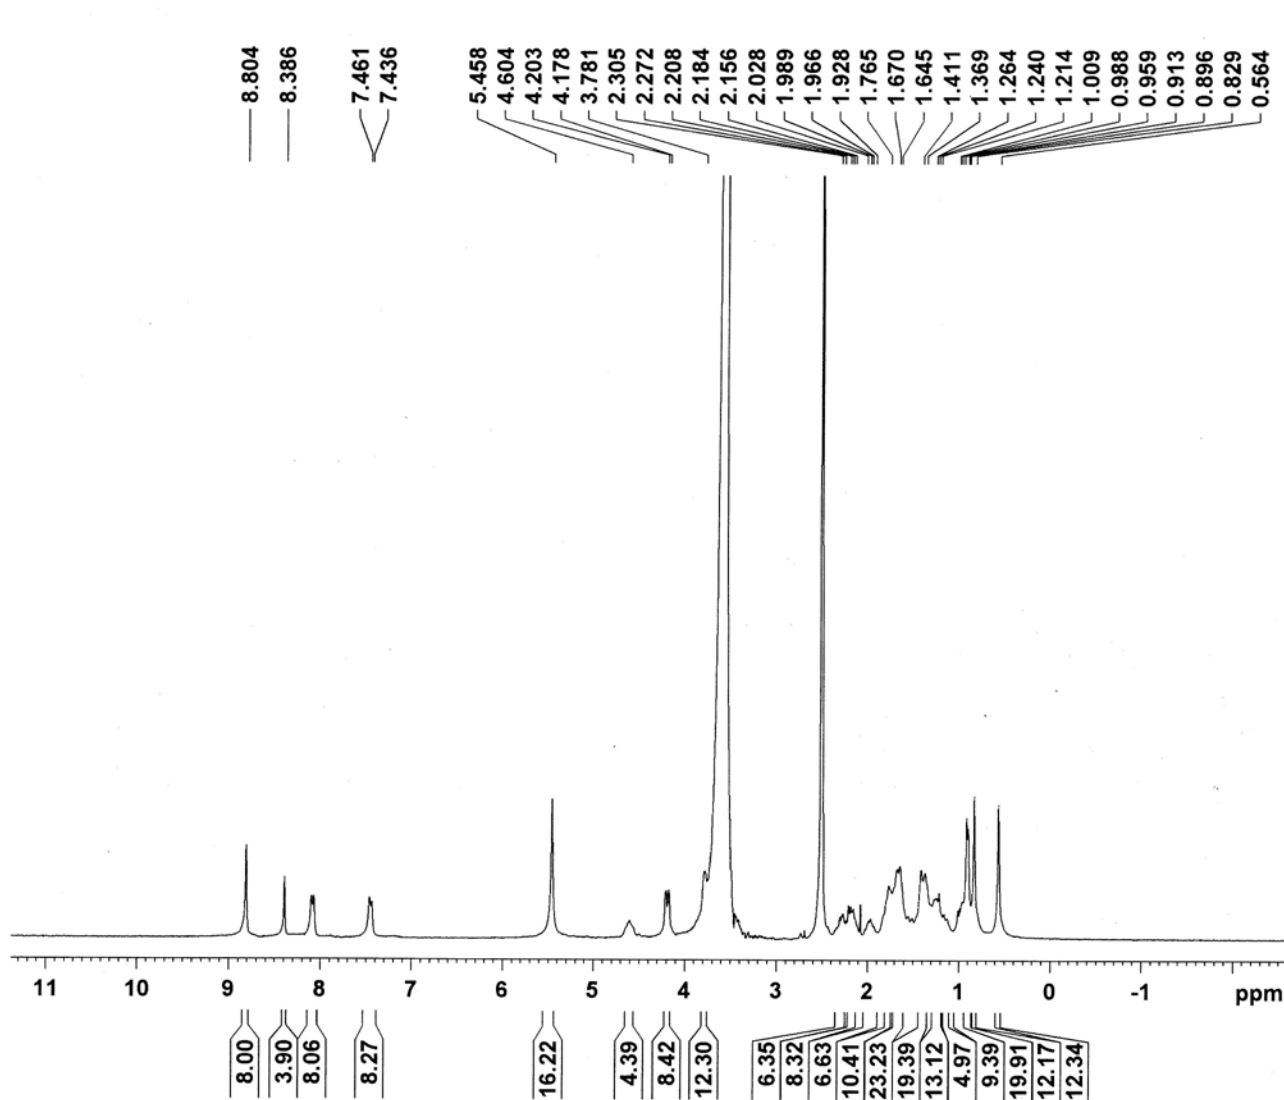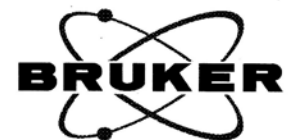

Current Data Parameters  
 NAME DA-244A  
 EXPNO 3  
 PROCNO 1

F2 - Acquisition Parameters  
 Date\_ 20140104  
 Time 9.14  
 INSTRUM spect  
 PROBHD 5 mm DUL 13C-1  
 PULPROG zg30  
 TD 65536  
 SOLVENT CDCl3  
 NS 11  
 DS 2  
 SWH 6172.839 Hz  
 FIDRES 0.094190 Hz  
 AQ 5.3084660 sec  
 RG 35.9  
 DW 81.000 usec  
 DE 6.00 usec  
 TE 300.0 K  
 D1 1.00000000 sec  
 TD0 1

===== CHANNEL f1 =====  
 NUC1 1H  
 P1 13.15 usec  
 PL1 0.00 dB  
 SFO1 300.1318534 MHz

F2 - Processing parameters  
 SI 32768  
 SF 300.1314262 MHz  
 WDW EM  
 SSB 0  
 LB 0.30 Hz  
 GB 0  
 PC 1.00

<sup>1</sup>H NMR (300 MHz, DMSO-d<sub>6</sub>) of compound 2

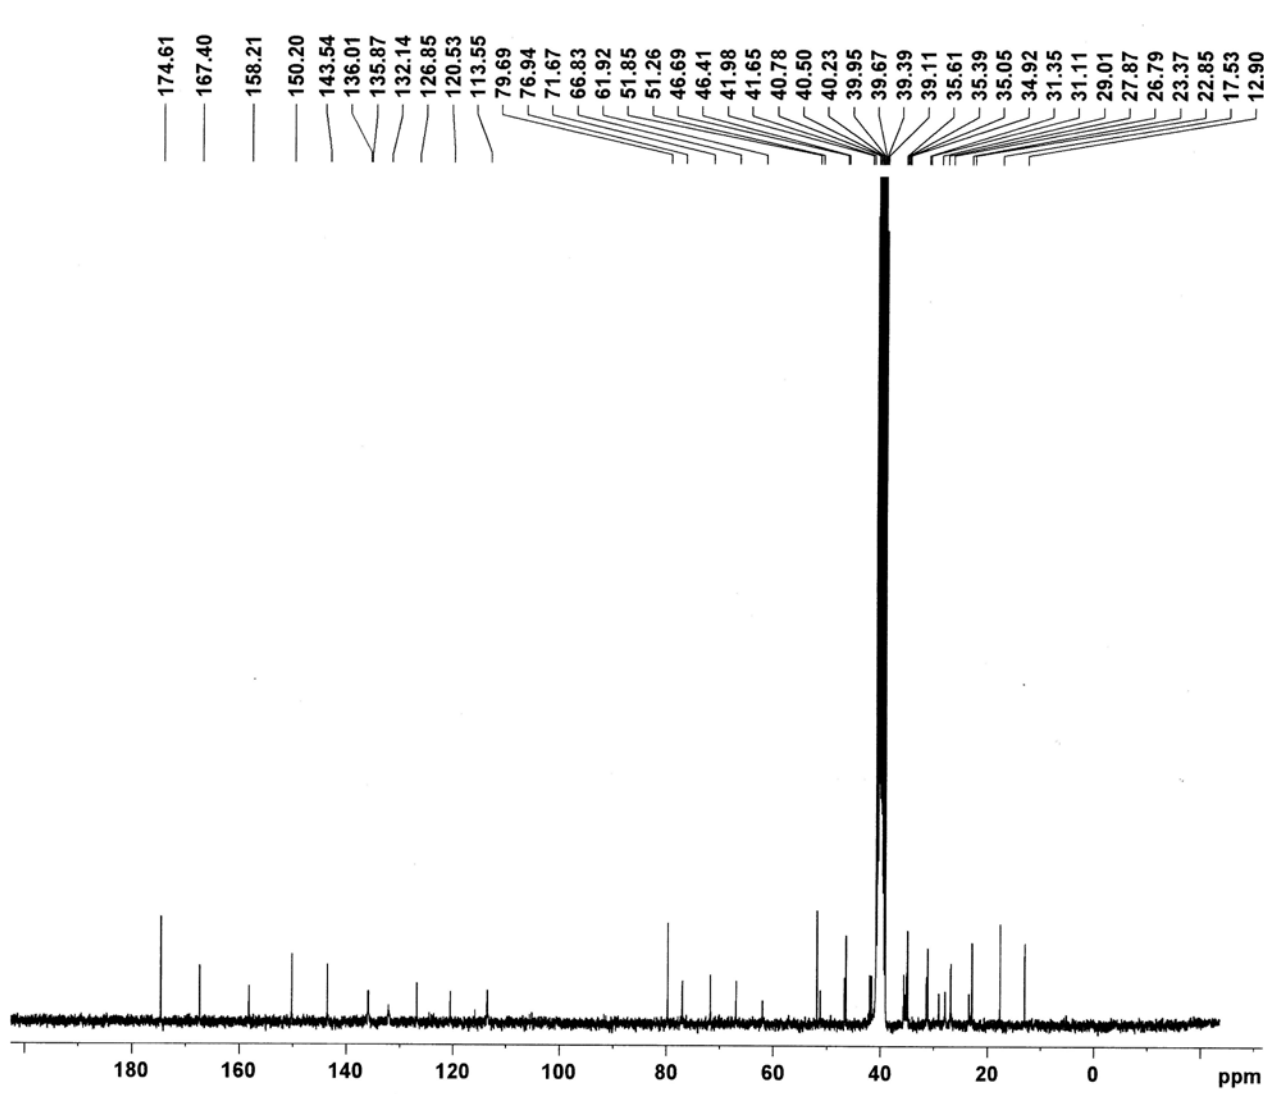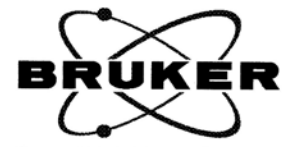

Current Data Parameters  
 NAME DA-244A  
 EXPNO 2  
 PROCNO 1

F2 - Acquisition Parameters  
 Date\_ 20140104  
 Time 8.35  
 INSTRUM spect  
 PROBHD 5 mm DUL 13C-1  
 PULPROG zgpg30  
 TD 65536  
 SOLVENT CDC13  
 NS 8437  
 DS 4  
 SWH 17985.611 Hz  
 FIDRES 0.274439 Hz  
 AQ 1.8219508 sec  
 RG 645.1  
 DW 27.800 usec  
 DE 6.00 usec  
 TE 300.0 K  
 D1 2.00000000 sec  
 d11 0.03000000 sec  
 DELTA 1.89999998 sec  
 TD0 1

===== CHANNEL f1 =====  
 NUC1 13C  
 P1 9.30 usec  
 PL1 0.00 dB  
 SFO1 75.4752953 MHz

===== CHANNEL f2 =====  
 CPDPRG2 waltz16  
 NUC2 1H  
 PCPD2 80.00 usec  
 PL2 0.00 dB  
 PL12 15.68 dB  
 PL13 16.00 dB  
 SFO2 300.1312005 MHz

F2 - Processing parameters  
 SI 32768  
 SF 75.4680937 MHz  
 WDW EM  
 SSB 0  
 LB 1.00 Hz  
 GB 0  
 PC 1.40

<sup>13</sup>C NMR (75 MHz, DMSO-d<sub>6</sub>) of compound 2

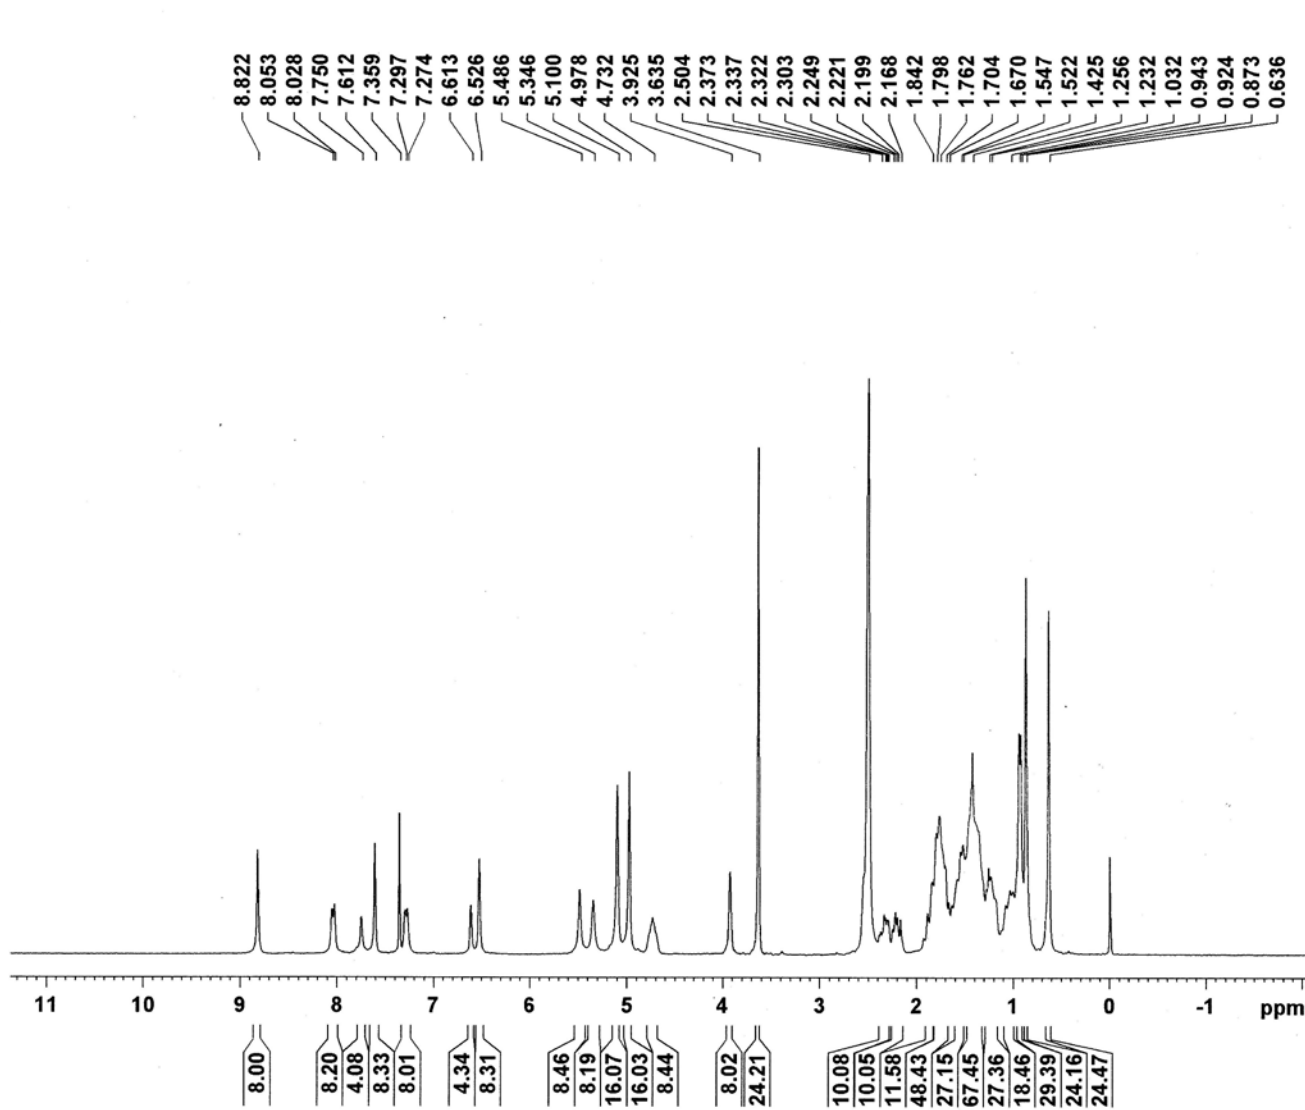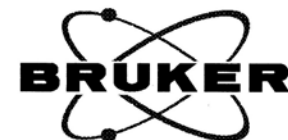

Current Data Parameters  
 NAME DA-245  
 EXPNO 4  
 PROCNO 1

F2 - Acquisition Parameters  
 Date\_ 20140101  
 Time 16.47  
 INSTRUM spect  
 PROBHD 5 mm DUL 13C-1  
 PULPROG zg30  
 TD 65536  
 SOLVENT CDCl3  
 NS 16  
 DS 2  
 SWH 6172.839 Hz  
 FIDRES 0.094190 Hz  
 AQ 5.3084660 sec  
 RG 90.5  
 DW 81.000 usec  
 DE 6.00 usec  
 TE 300.0 K  
 D1 1.00000000 sec  
 TD0 1

===== CHANNEL f1 =====  
 NUC1 1H  
 P1 13.15 usec  
 PL1 0.00 dB  
 SFO1 300.1318534 MHz

F2 - Processing parameters  
 SI 32768  
 SF 300.1299788 MHz  
 WDW EM  
 SSB 0  
 LB 0.30 Hz  
 GB 0  
 PC 1.00

$^1\text{H}$  NMR (300 MHz,  $\text{CDCl}_3 + \text{DMSO-d}_6$ ) of compound 3

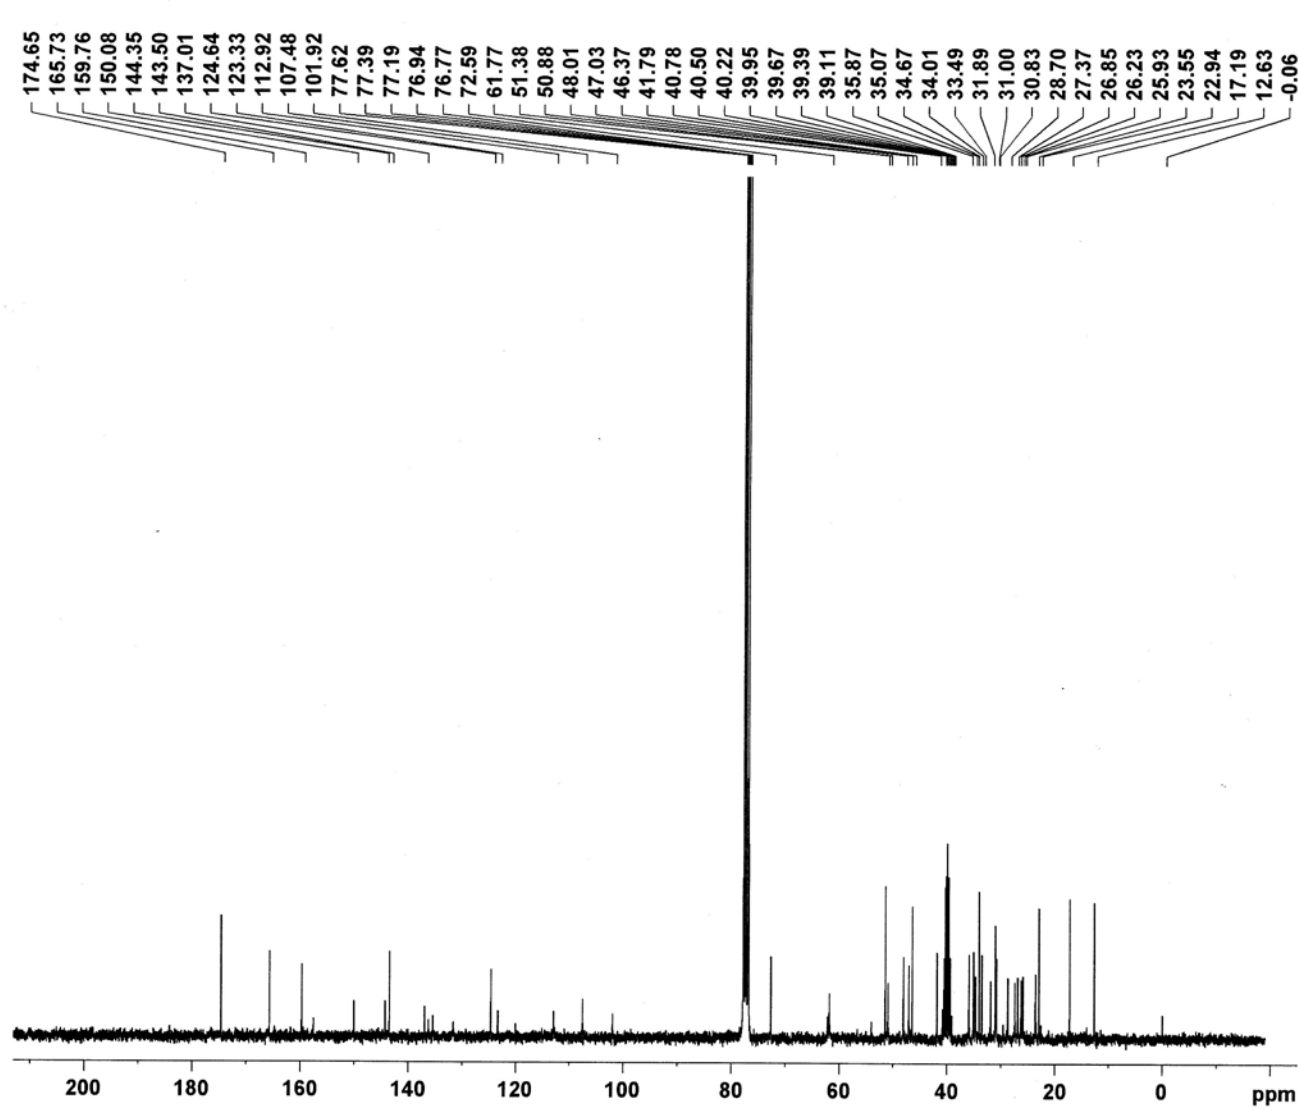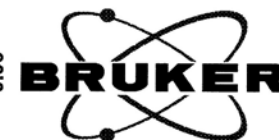

Current Data Parameters  
 NAME DA-245  
 EXPNO 3  
 PROCNO 1

F2 - Acquisition Parameters  
 Date\_ 20140101  
 Time 16.26  
 INSTRUM spect  
 PROBHD 5 mm DUL 13C-1  
 PULPROG zgpg30  
 TD 65536  
 SOLVENT CDCl3  
 NS 3000  
 DS 4  
 SWH 17985.611 Hz  
 FIDRES 0.274439 Hz  
 AQ 1.8219508 sec  
 RG 1824.6  
 DW 27.800 usec  
 DE 6.00 usec  
 TE 300.0 K  
 D1 2.00000000 sec  
 d11 0.03000000 sec  
 DELTA 1.89999998 sec  
 TD0 1

===== CHANNEL f1 =====  
 NUC1 13C  
 P1 9.30 usec  
 PL1 0.00 dB  
 SFO1 75.4752953 MHz

===== CHANNEL f2 =====  
 CPDPRG2 waltz16  
 NUC2 1H  
 PCPD2 80.00 usec  
 PL2 0.00 dB  
 PL12 15.68 dB  
 PL13 16.00 dB  
 SFO2 300.1312005 MHz

F2 - Processing parameters  
 SI 32768  
 SF 75.4677490 MHz  
 WDW EM  
 SSB 0  
 LB 1.00 Hz  
 GB 0  
 PC 1.40

<sup>13</sup>C NMR (75 MHz, CDCl<sub>3</sub> + DMSO-d<sub>6</sub>) of compound 3

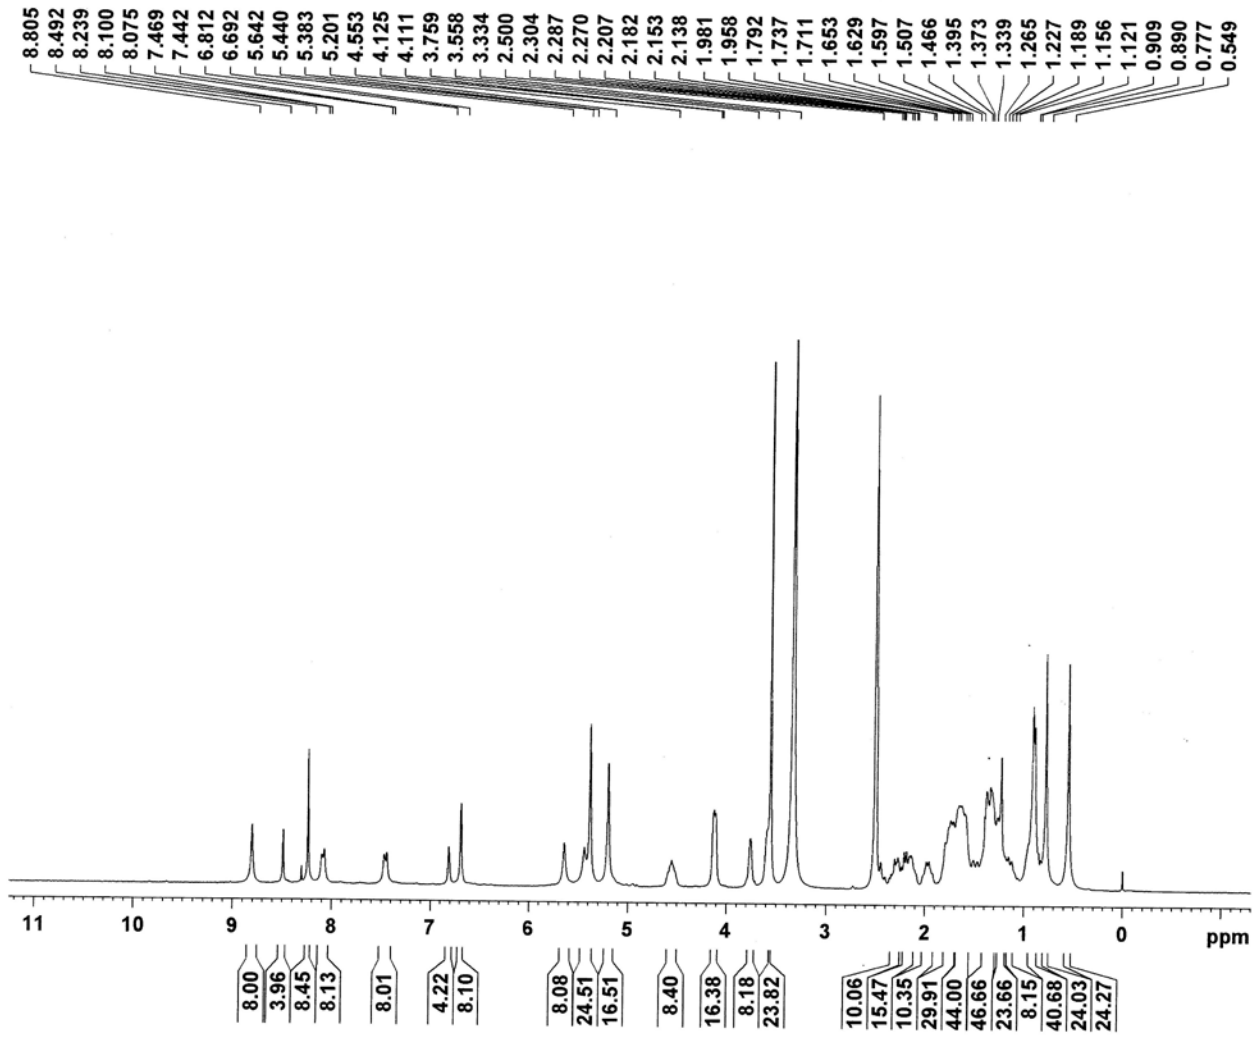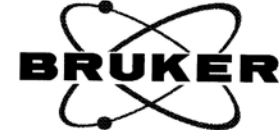

Current Data Parameters  
 NAME DA-295  
 EXPNO 4  
 PROCNO 1

F2 - Acquisition Parameters  
 Date\_ 20140413  
 Time 10.08  
 INSTRUM spect  
 PROBHD 5 mm DUL 13C-1  
 PULPROG zg30  
 TD 65536  
 SOLVENT DMSO  
 NS 16  
 DS 2  
 SWH 6172.839 Hz  
 FIDRES 0.094190 Hz  
 AQ 5.3084660 sec  
 RG 64  
 DW 81.000 usec  
 DE 6.00 usec  
 TE 300.0 K  
 D1 1.00000000 sec  
 TD0 1

===== CHANNEL f1 =====  
 NUC1 1H  
 P1 13.15 usec  
 PL1 0.00 dB  
 SFO1 300.1318534 MHz

F2 - Processing parameters  
 SI 32768  
 SF 300.1300024 MHz  
 WDW EM  
 SSB 0  
 LB 0.30 Hz  
 GB 0  
 PC 1.00

<sup>1</sup>H NMR (300 MHz, DMSO-d<sub>6</sub>) of compound 4

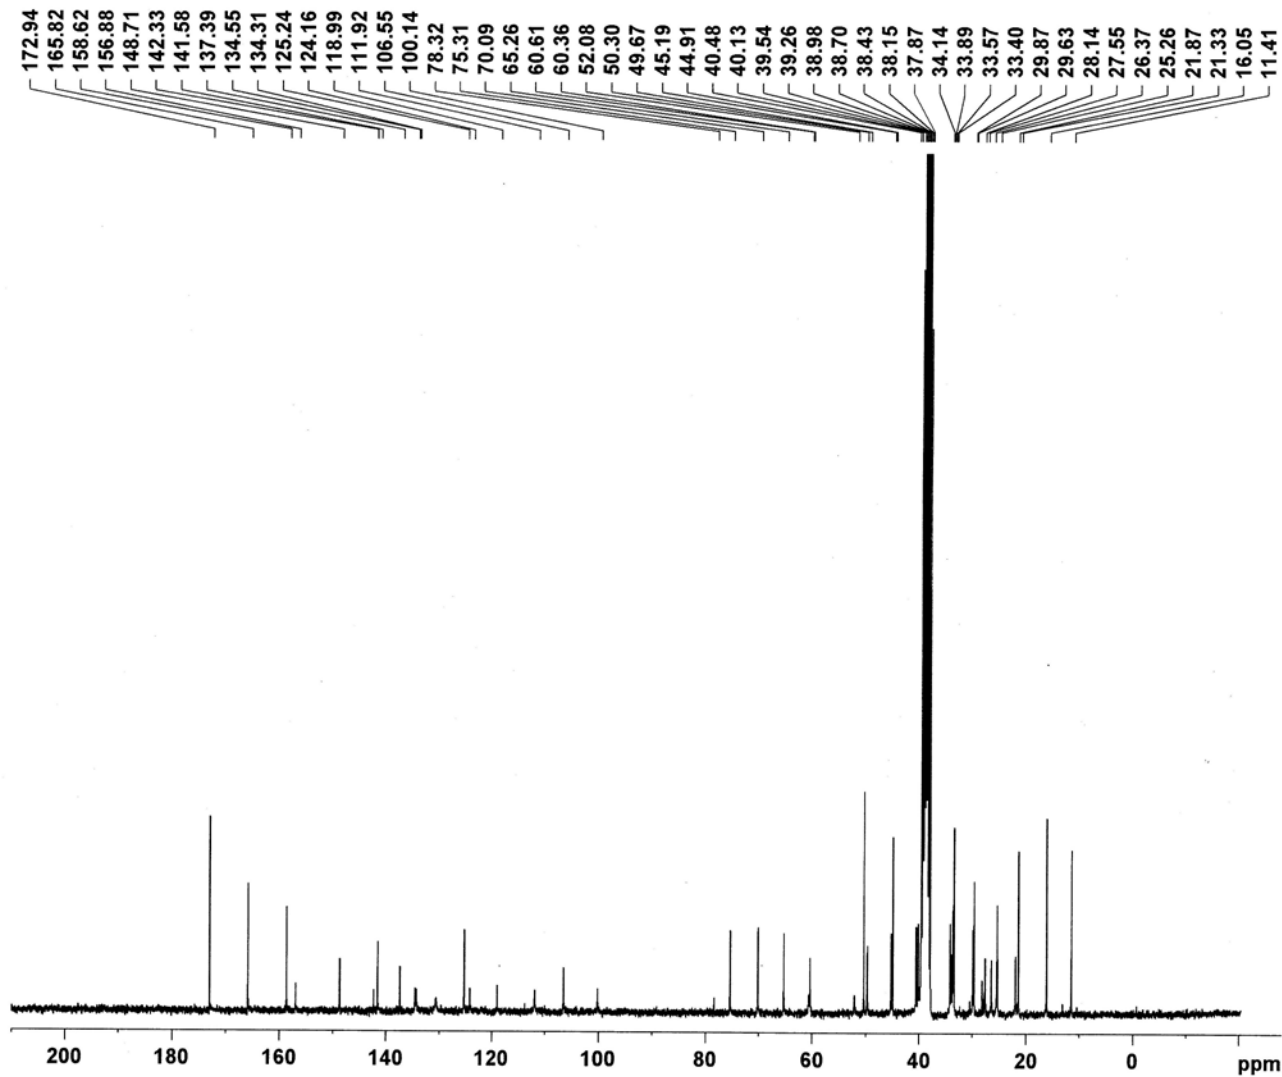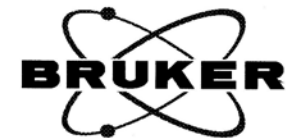

Current Data Parameters  
 NAME DA-295  
 EXPNO 3  
 PROCNO 1

F2 - Acquisition Parameters  
 Date\_ 20140412  
 Time 22.24  
 INSTRUM spect  
 PROBHD 5 mm DUL 13C-1  
 PULPROG zgpg30  
 TD 65536  
 SOLVENT DMSO  
 NS 10850  
 DS 4  
 SWH 17985.611 Hz  
 FIDRES 0.274439 Hz  
 AQ 1.8219508 sec  
 RG 3251  
 DW 27.800 usec  
 DE 6.00 usec  
 TE 300.0 K  
 D1 2.00000000 sec  
 d11 0.03000000 sec  
 DELTA 1.89999998 sec  
 TD0 1

===== CHANNEL f1 =====  
 NUC1 13C  
 P1 9.30 usec  
 PL1 0.00 dB  
 SFO1 75.4752953 MHz

===== CHANNEL f2 =====  
 CPDPRG2 waltz16  
 NUC2 1H  
 PCPD2 80.00 usec  
 PL2 0.00 dB  
 PL12 15.68 dB  
 PL13 16.00 dB  
 SFO2 300.1312005 MHz

F2 - Processing parameters  
 SI 32768  
 SF 75.4678483 MHz  
 WDW EM  
 SSB 0  
 LB 1.00 Hz  
 GB 0  
 PC 1.40

$^{13}\text{C}$  NMR (75 MHz, DMSO- $d_6$ ) of compound 4

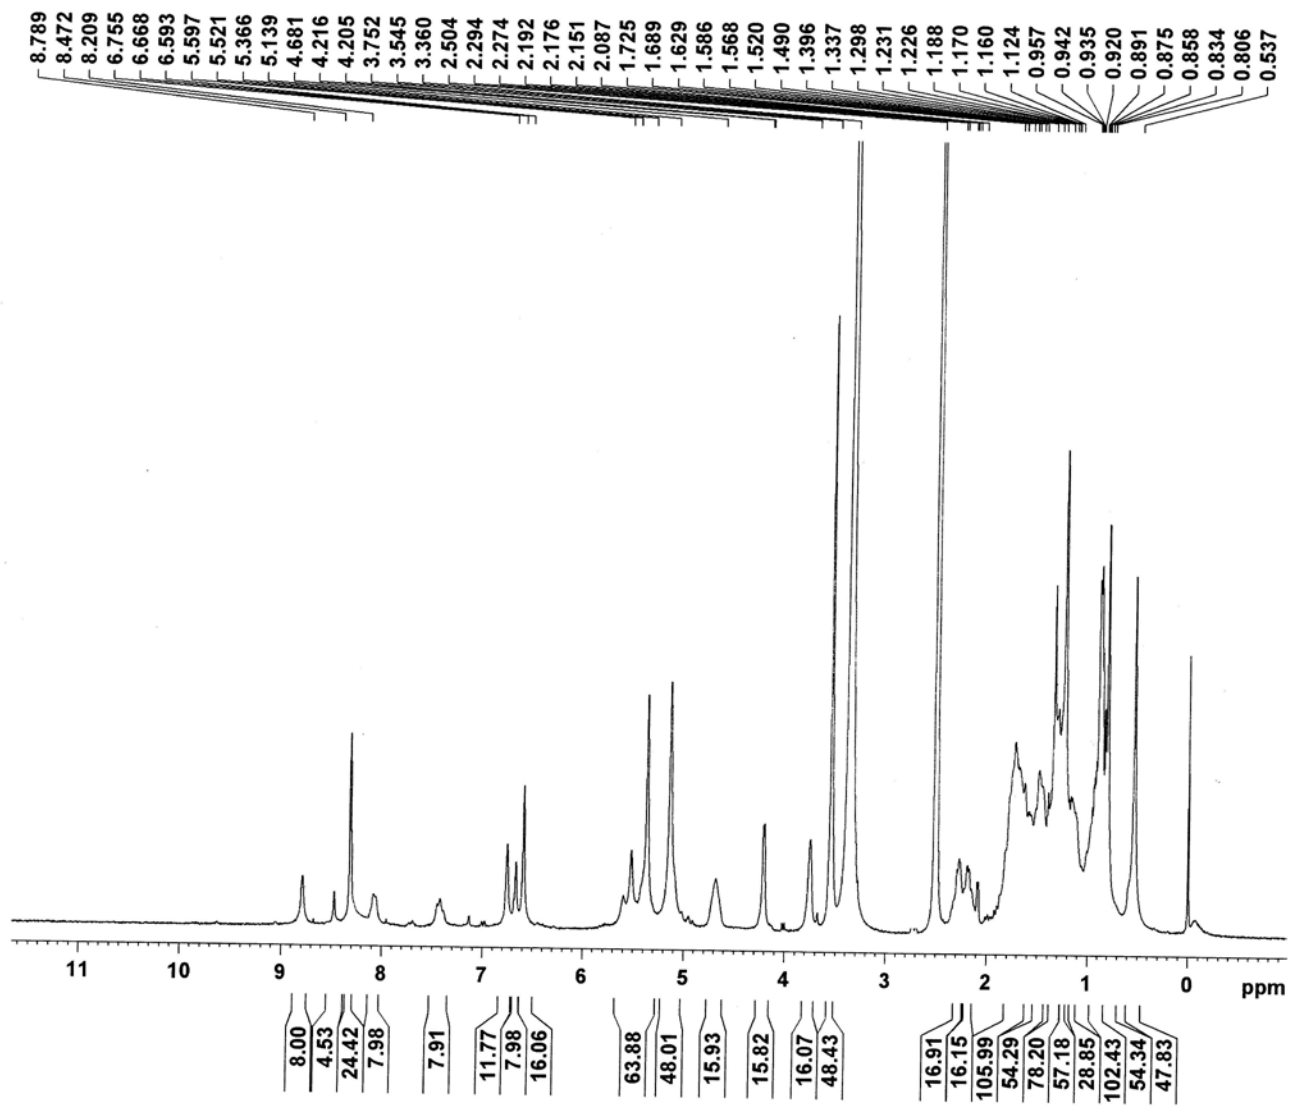

<sup>1</sup>H NMR (300 MHz, DMSO-d<sub>6</sub>) of compound 5

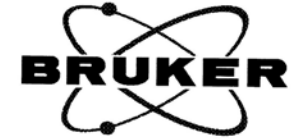

Current Data Parameters  
 NAME DA-277  
 EXPNO 1  
 PROCNO 1

F2 - Acquisition Parameters  
 Date\_ 20140225  
 Time 22.16  
 INSTRUM spect  
 PROBHD 5 mm DUL 13C-1  
 PULPROG zg30  
 TD 65536  
 SOLVENT DMSO  
 NS 22  
 DS 2  
 SWH 6172.839 Hz  
 FIDRES 0.094190 Hz  
 AQ 5.3084660 sec  
 RG 114  
 DW 81.000 usec  
 DE 6.00 usec  
 TE 300.0 K  
 D1 1.00000000 sec  
 TD0 1

===== CHANNEL f1 =====  
 NUC1 1H  
 P1 13.15 usec  
 PL1 0.00 dB  
 SFO1 300.1318534 MHz

F2 - Processing parameters  
 SI 32768  
 SF 300.1300012 MHz  
 WDW EM  
 SSB 0  
 LB 0.30 Hz  
 GB 0  
 PC 1.00

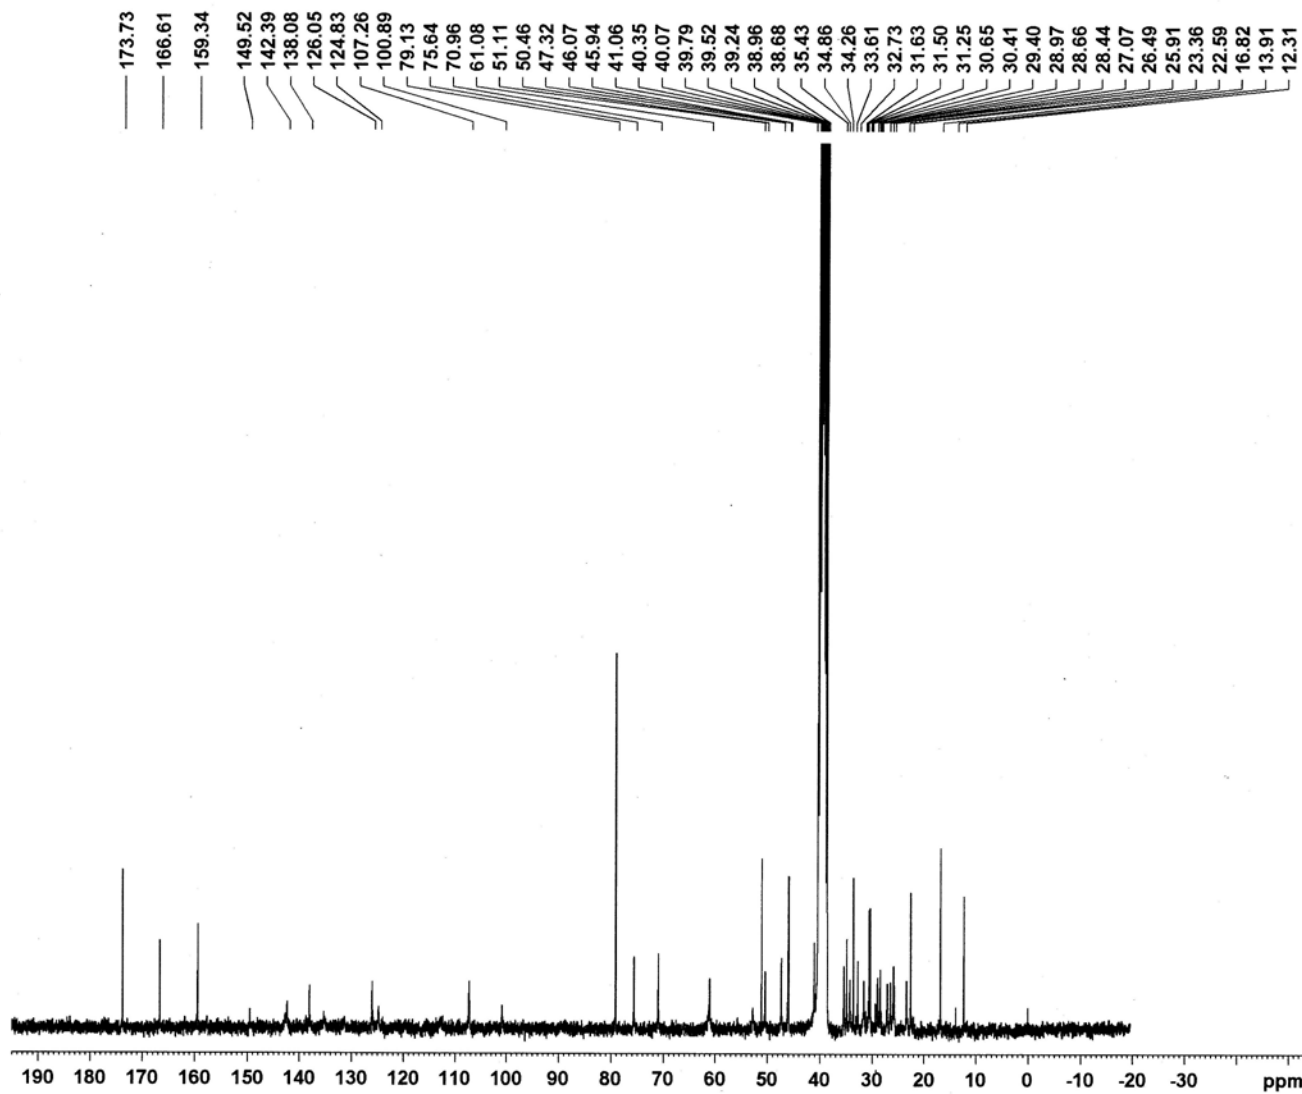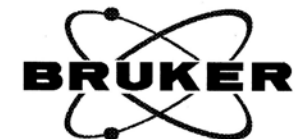

Current Data Parameters  
 NAME DA-277  
 EXPNO 2  
 PROCNO 1

F2 - Acquisition Parameters  
 Date\_ 20140302  
 Time 18.42  
 INSTRUM spect  
 PROBHD 5 mm DUL 13C-1  
 PULPROG zgpg30  
 TD 65536  
 SOLVENT DMSO  
 NS 14053  
 DS 4  
 SWH 17985.611 Hz  
 FIDRES 0.274439 Hz  
 AQ 1.8219508 sec  
 RG 912.3  
 DW 27.800 usec  
 DE 6.00 usec  
 TE 300.0 K  
 D1 2.00000000 sec  
 d11 0.03000000 sec  
 DELTA 1.89999998 sec  
 TD0 1

===== CHANNEL f1 =====  
 NUC1 13C  
 P1 9.30 usec  
 PL1 0.00 dB  
 SFO1 75.4752953 MHz

===== CHANNEL f2 =====  
 CPDPRG2 waltz16  
 NUC2 1H  
 PCPD2 80.00 usec  
 PL2 0.00 dB  
 PL12 15.68 dB  
 PL13 16.00 dB  
 SFO2 300.1312005 MHz

F2 - Processing parameters  
 SI 32768  
 SF 75.4677867 MHz  
 WDW EM  
 SSB 0  
 LB 1.00 Hz  
 GB 0  
 PC 1.40

<sup>13</sup>C NMR (75 MHz, DMSO-d<sub>6</sub>) of compound 5



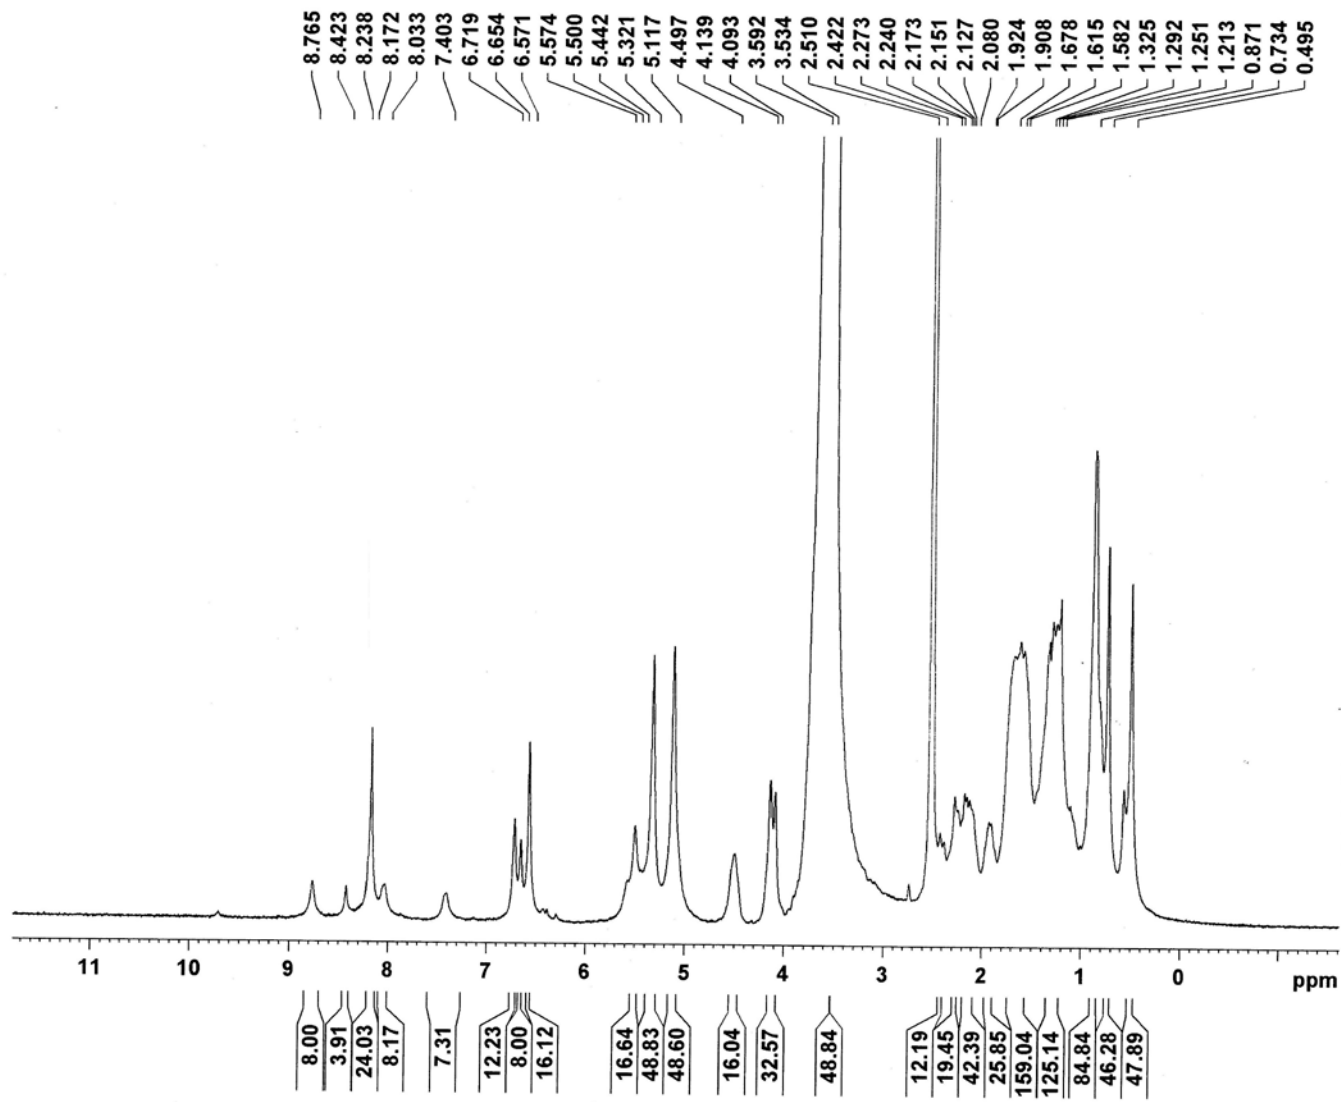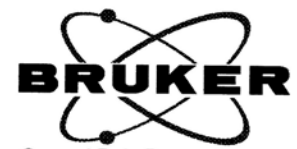

Current Data Parameters  
 NAME DA-251  
 EXPNO 4  
 PROCNO 1

F2 - Acquisition Parameters  
 Date\_ 20140126  
 Time 11.29  
 INSTRUM spect  
 PROBHD 5 mm DUL 13C-1  
 PULPROG zg30  
 TD 65536  
 SOLVENT DMSO  
 NS 16  
 DS 2  
 SWH 6172.839 Hz  
 FIDRES 0.094190 Hz  
 AQ 5.3084660 sec  
 RG 32  
 DW 81.000 usec  
 DE 6.00 usec  
 TE 300.0 K  
 D1 1.00000000 sec  
 TD0 1

===== CHANNEL f1 =====  
 NUC1 1H  
 P1 13.15 usec  
 PL1 0.00 dB  
 SFO1 300.1318534 MHz

F2 - Processing parameters  
 SI 32768  
 SF 300.1300000 MHz  
 WDW EM  
 SSB 0  
 LB 0.30 Hz  
 GB 0  
 PC 1.00

<sup>1</sup>H NMR (300 MHz, DMSO-d<sub>6</sub>) of compound 6

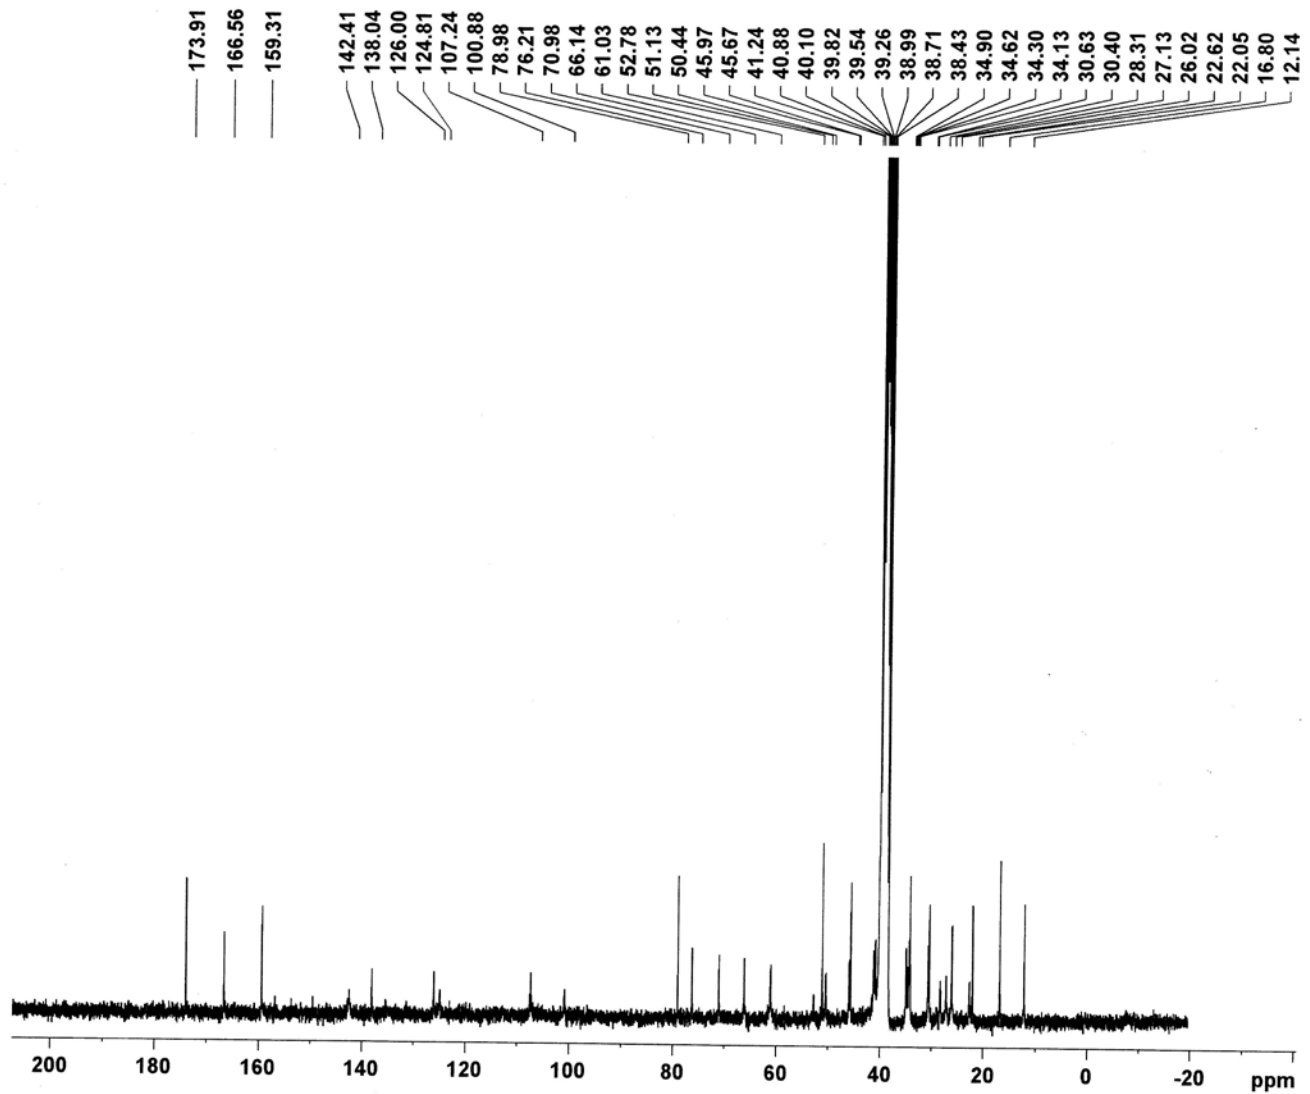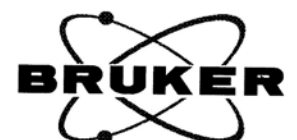

Current Data Parameters  
 NAME DA-251  
 EXPNO 3  
 PROCNO 1

F2 - Acquisition Parameters  
 Date\_ 20140125  
 Time 22.00  
 INSTRUM spect  
 PROBHD 5 mm DUL 13C-1  
 PULPROG zgpg30  
 TD 65536  
 SOLVENT DMSO  
 NS 12491  
 DS 4  
 SWH 17985.611 Hz  
 FIDRES 0.274439 Hz  
 AQ 1.8219508 sec  
 RG 645.1  
 DW 27.800 usec  
 DE 6.00 usec  
 TE 300.0 K  
 D1 2.00000000 sec  
 d11 0.03000000 sec  
 DELTA 1.89999998 sec  
 TD0 1

===== CHANNEL f1 =====  
 NUC1 13C  
 P1 9.30 usec  
 PL1 0.00 dB  
 SFO1 75.4752953 MHz

===== CHANNEL f2 =====  
 CPDPRG2 waltz16  
 NUC2 1H  
 PCPD2 80.00 usec  
 PL2 0.00 dB  
 PL12 15.68 dB  
 PL13 16.00 dB  
 SFO2 300.1312005 MHz

F2 - Processing parameters  
 SI 32768  
 SF 75.4677867 MHz  
 WDW EM  
 SSB 0  
 LB 1.00 Hz  
 GB 0  
 PC 1.40

<sup>13</sup>C NMR (75 MHz, DMSO-d<sub>6</sub>) of compound 6

# Spectrum Report

GSK-M1

Final - Shots 500 - IISER-96-1; Run #116; Label B6

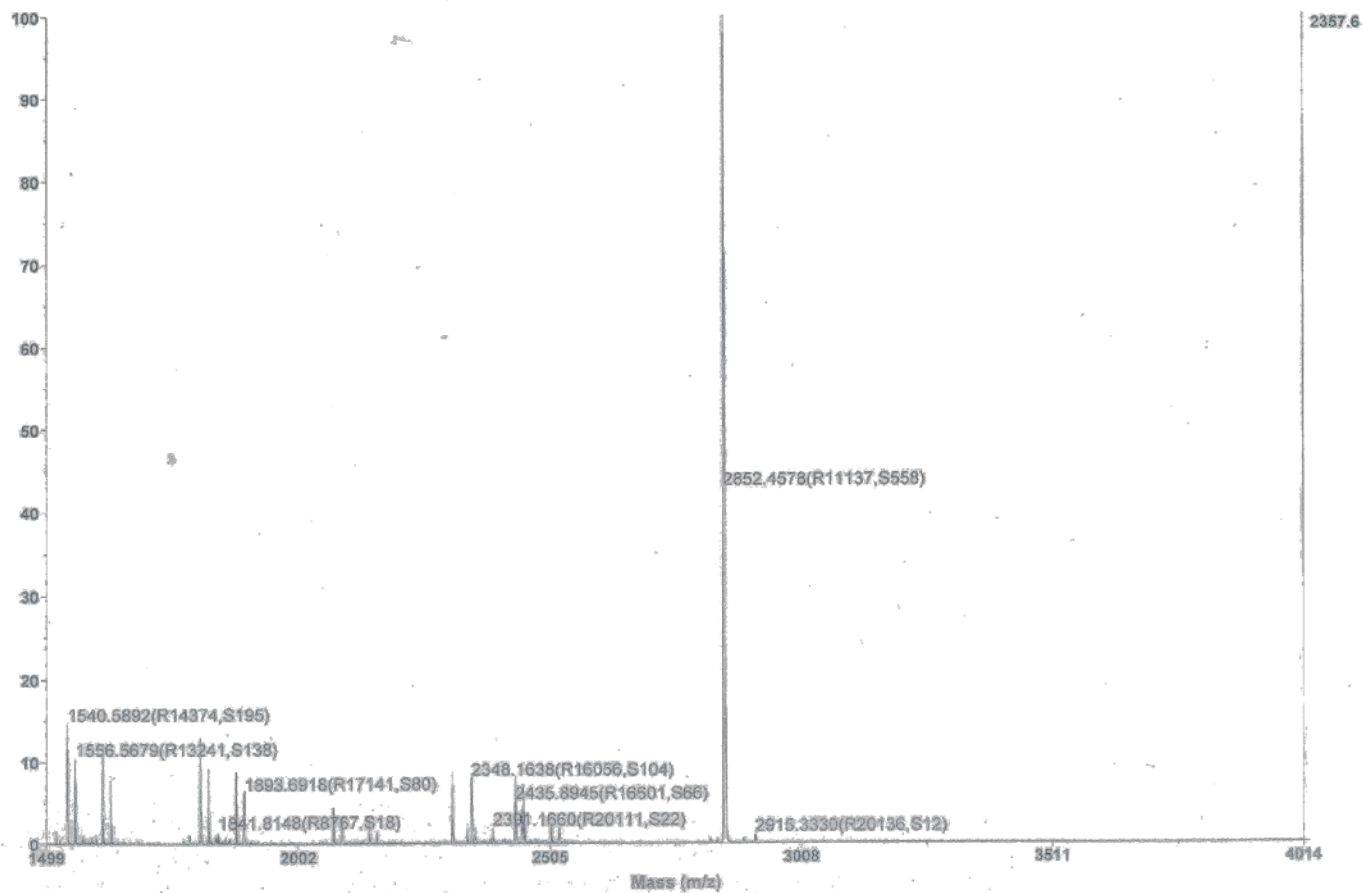

MALDI-TOF of Dendrimer 2

Spectrum Report

GSK-M5

Final - Shots 800 - IISER-98-1; Label B10

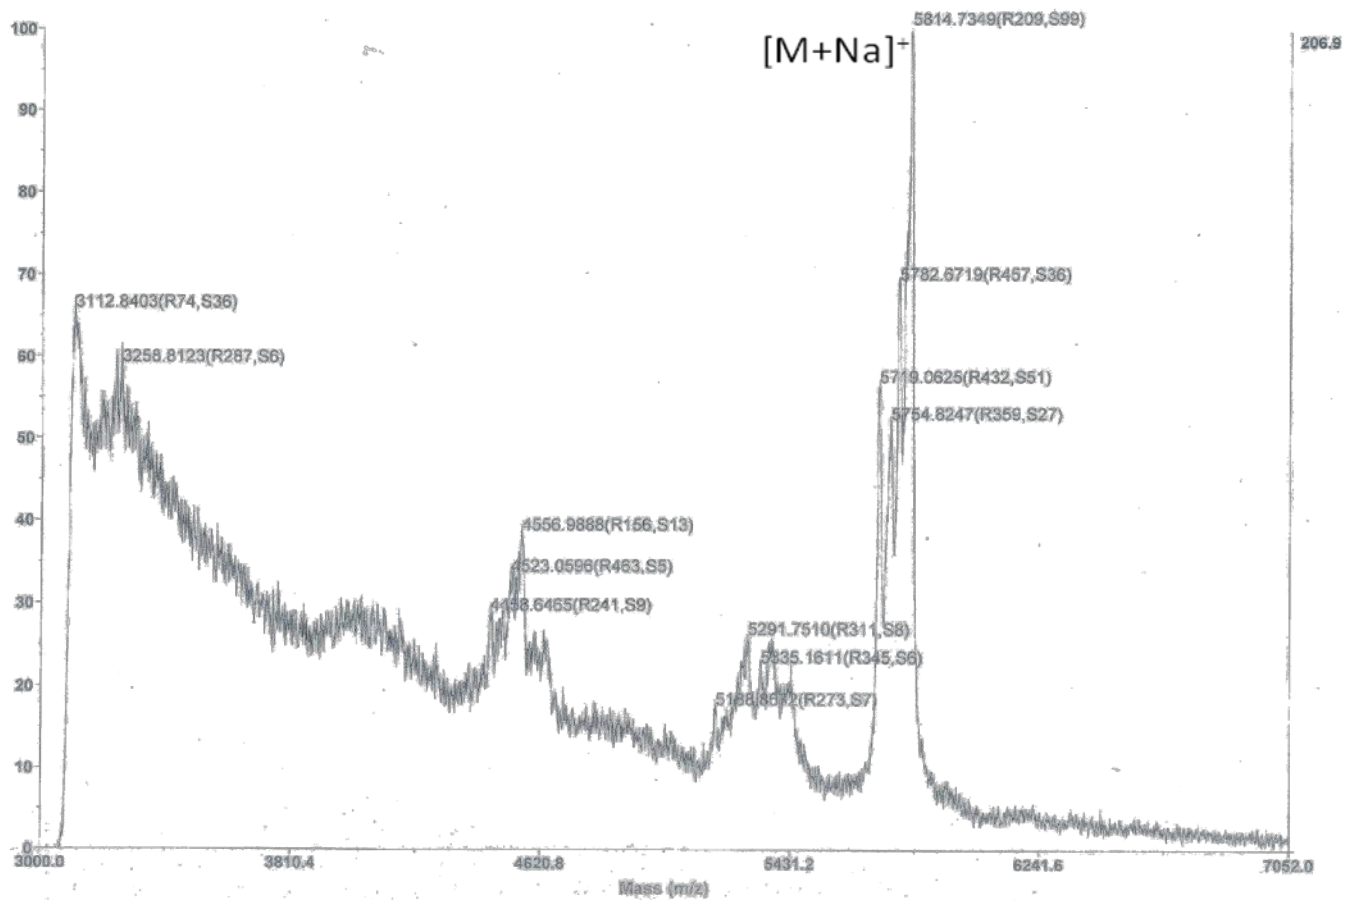

MALDI-TOF of Dendrimer 3

Spectrum Report

GSK-M2

Final - Shots 800 - IISER-96-1; Label B7

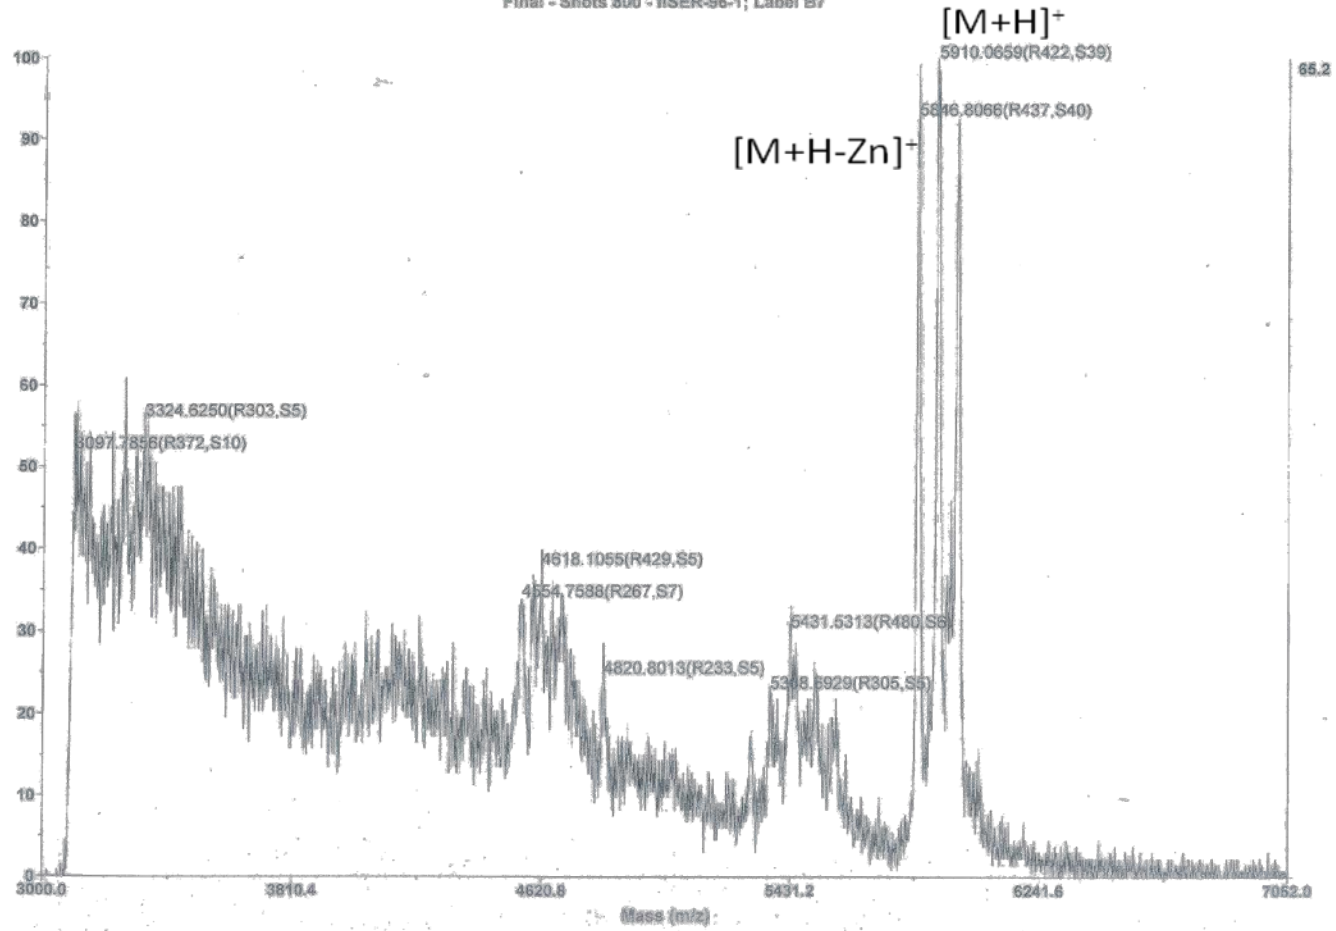

MALDI-TOF of Dendrimer 4

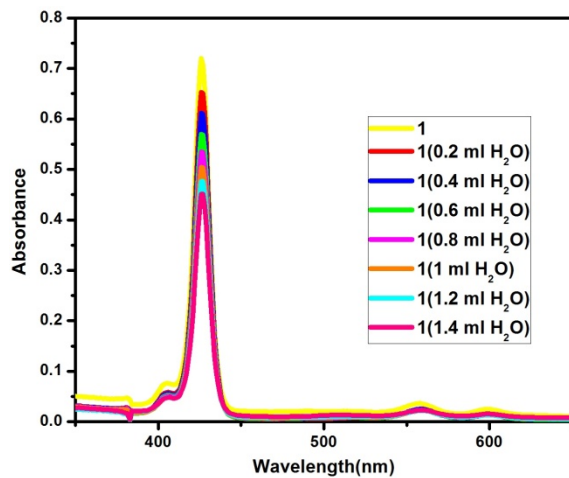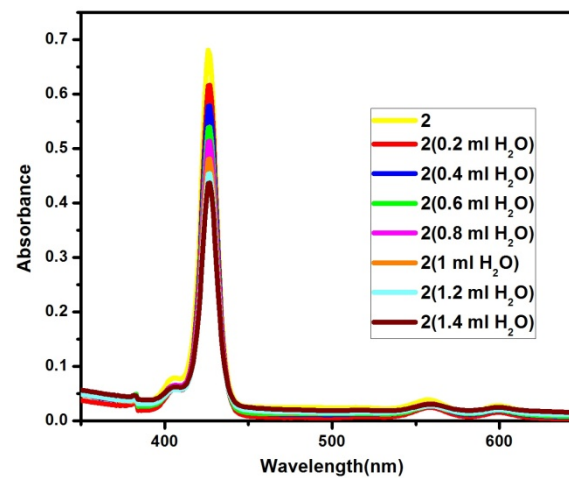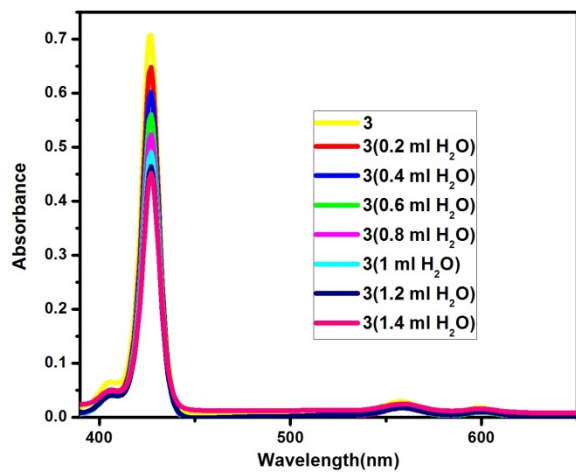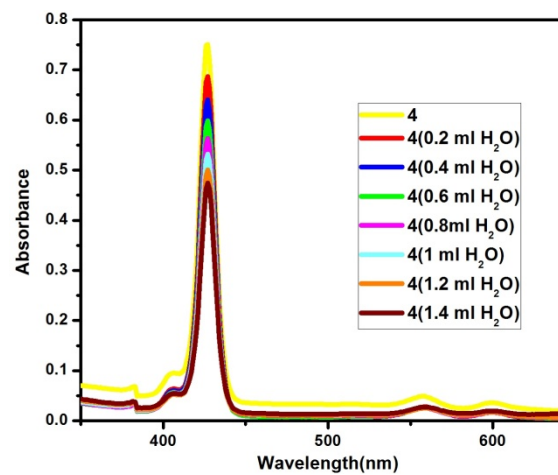

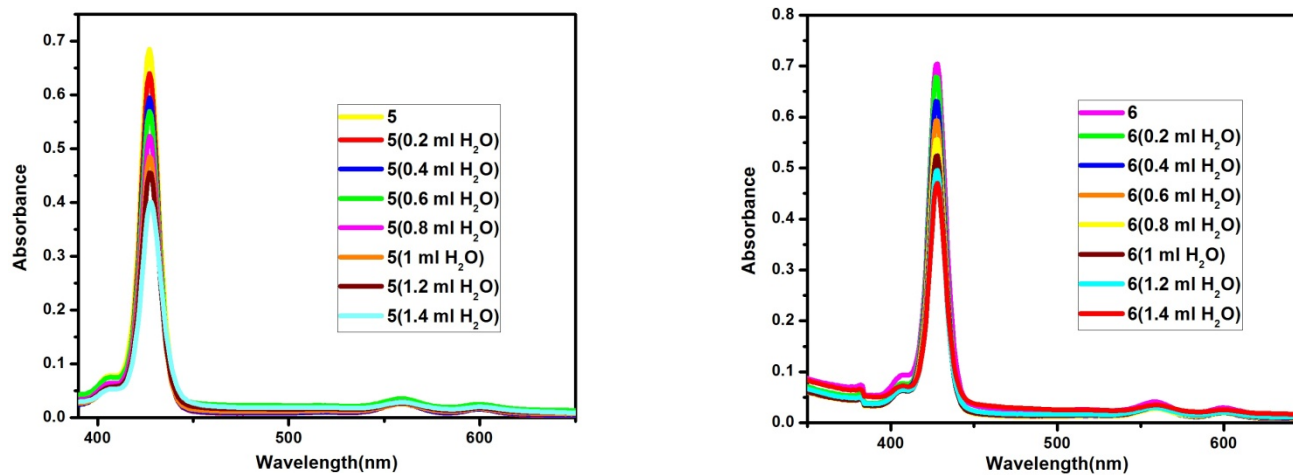

**Fig. 1:** Absorption spectrum of Dendrimers **1-6** at 70% water in THF (conc. =  $10^{-5}$  M)

| Compound | Water (ml) | Soret band | $\lambda_a^{\max}$ |                |                   |                |                   |
|----------|------------|------------|--------------------|----------------|-------------------|----------------|-------------------|
|          |            |            | $\epsilon_{\max}$  | Q <sub>1</sub> | $\epsilon_{\max}$ | Q <sub>2</sub> | $\epsilon_{\max}$ |
| <b>1</b> | ---        | 426        | 0.72               | 558            | 0.036             | 599            | 0.025             |
| <b>1</b> | 0.2        | 426        | 0.66               | 558            | 0.026             | 599            | 0.014             |
| <b>1</b> | 0.4        | 426        | 0.61               | 558            | 0.025             | 599            | 0.014             |
| <b>1</b> | 0.6        | 426        | 0.57               | 558            | 0.023             | 599            | 0.013             |
| <b>1</b> | 0.8        | 426        | 0.53               | 558            | 0.023             | 599            | 0.015             |
| <b>1</b> | 1          | 426        | 0.50               | 559            | 0.021             | 599            | 0.013             |
| <b>1</b> | 1.2        | 426        | 0.47               | 559            | 0.022             | 599            | 0.015             |
| <b>1</b> | 1.4        | 426        | 0.45               | 559            | 0.023             | 599            | 0.015             |

**Table 1.** Absorption studies of **1** in THF with 70% water at rt.

| Compound | Water (ml) | Soret band | $\lambda_a^{\max}$ | $Q_1$ | $\epsilon_{\max}$ | $Q_2$ |       |
|----------|------------|------------|--------------------|-------|-------------------|-------|-------|
|          |            |            | $\epsilon_{\max}$  |       |                   |       |       |
| <b>2</b> | ---        | 426        | 0.68               | 559   | 0.039             | 599   | 0.028 |
| <b>2</b> | 0.2        | 426        | 0.62               | 559   | 0.025             | 599   | 0.015 |
| <b>2</b> | 0.4        | 426        | 0.58               | 559   | 0.028             | 599   | 0.019 |
| <b>2</b> | 0.6        | 426        | 0.57               | 559   | 0.027             | 599   | 0.020 |
| <b>2</b> | 0.8        | 426        | 0.51               | 559   | 0.031             | 599   | 0.024 |
| <b>2</b> | 1          | 426        | 0.48               | 559   | 0.029             | 599   | 0.021 |
| <b>2</b> | 1.2        | 426        | 0.45               | 559   | 0.027             | 599   | 0.020 |
| <b>2</b> | 1.4        | 426        | 0.43               | 559   | 0.030             | 599   | 0.025 |

**Table 2.** Absorption studies of **2** in THF with 70% water at rt.



| Compound | Water (ml) | Soret band | $\lambda_a^{\max}$ |                |                   |                |                   |
|----------|------------|------------|--------------------|----------------|-------------------|----------------|-------------------|
|          |            |            | $\epsilon_{\max}$  | Q <sub>1</sub> | $\epsilon_{\max}$ | Q <sub>2</sub> | $\epsilon_{\max}$ |
| <b>3</b> | ---        | 427        | 0.71               | 558            | 0.029             | 599            | 0.018             |
| <b>3</b> | 0.2        | 427        | 0.65               | 559            | 0.021             | 600            | 0.009             |
| <b>3</b> | 0.4        | 427        | 0.60               | 559            | 0.022             | 600            | 0.009             |
| <b>3</b> | 0.6        | 427        | 0.56               | 559            | 0.019             | 600            | 0.009             |
| <b>3</b> | 0.8        | 427        | 0.52               | 559            | 0.018             | 600            | 0.010             |
| <b>3</b> | 1          | 427        | 0.49               | 559            | 0.017             | 600            | 0.009             |
| <b>3</b> | 1.2        | 427        | 0.46               | 559            | 0.017             | 600            | 0.010             |
| <b>3</b> | 1.4        | 427        | 0.45               | 559            | 0.025             | 599            | 0.015             |

**Table 3.** Absorption studies of **3** in THF with 70% water at rt.

| Compound | Water (ml) | Soret band | $\lambda_a^{\max}$ |                |                   |                |                   |
|----------|------------|------------|--------------------|----------------|-------------------|----------------|-------------------|
|          |            |            | $\epsilon_{\max}$  | Q <sub>1</sub> | $\epsilon_{\max}$ | Q <sub>2</sub> | $\epsilon_{\max}$ |
| <b>4</b> | ---        | 427        | 0.75               | 558            | 0.049             | 599            | 0.036             |
| <b>4</b> | 0.2        | 427        | 0.69               | 558            | 0.028             | 599            | 0.017             |
| <b>4</b> | 0.4        | 427        | 0.64               | 559            | 0.027             | 599            | 0.017             |
| <b>4</b> | 0.6        | 427        | 0.59               | 559            | 0.026             | 599            | 0.016             |
| <b>4</b> | 0.8        | 427        | 0.56               | 559            | 0.025             | 599            | 0.016             |
| <b>4</b> | 1          | 427        | 0.53               | 559            | 0.025             | 599            | 0.017             |
| <b>4</b> | 1.2        | 427        | 0.50               | 559            | 0.025             | 599            | 0.017             |
| <b>4</b> | 1.4        | 427        | 0.47               | 559            | 0.027             | 600            | 0.019             |

**Table 4.** Absorption studies of **4** in THF with 70% water at rt.

| Compound | Water (ml) | Soret band | $\lambda_a^{\max}$ |                |                   |                |                   |
|----------|------------|------------|--------------------|----------------|-------------------|----------------|-------------------|
|          |            |            | $\epsilon_{\max}$  | Q <sub>1</sub> | $\epsilon_{\max}$ | Q <sub>2</sub> | $\epsilon_{\max}$ |
| <b>5</b> | ---        | 427        | 0.68               | 558            | 0.035             | 599            | 0.023             |
| <b>5</b> | 0.2        | 427        | 0.64               | 559            | 0.026             | 600            | 0.015             |
| <b>5</b> | 0.4        | 427        | 0.59               | 559            | 0.026             | 600            | 0.016             |
| <b>5</b> | 0.6        | 427        | 0.56               | 560            | 0.035             | 600            | 0.025             |
| <b>5</b> | 0.8        | 427        | 0.52               | 559            | 0.029             | 600            | 0.019             |
| <b>5</b> | 1          | 427        | 0.48               | 559            | 0.025             | 600            | 0.017             |
| <b>5</b> | 1.2        | 427        | 0.45               | 560            | 0.027             | 600            | 0.018             |
| <b>5</b> | 1.4        | 428        | 0.39               | 560            | 0.029             | 600            | 0.020             |

**Table 5.** Absorption studies of **5** in THF with 70% water at rt.

| Compound | Water (ml) | Soret band | $\lambda_a^{\max}$ |                |                   |                |                   |
|----------|------------|------------|--------------------|----------------|-------------------|----------------|-------------------|
|          |            |            | $\epsilon_{\max}$  | Q <sub>1</sub> | $\epsilon_{\max}$ | Q <sub>2</sub> | $\epsilon_{\max}$ |
| <b>6</b> | ---        | 428        | 0.70               | 559            | 0.042             | 600            | 0.029             |
| <b>6</b> | 0.2        | 427        | 0.68               | 559            | 0.032             | 600            | 0.021             |
| <b>6</b> | 0.4        | 427        | 0.63               | 559            | 0.029             | 600            | 0.019             |
| <b>6</b> | 0.6        | 427        | 0.59               | 559            | 0.030             | 600            | 0.019             |
| <b>6</b> | 0.8        | 427        | 0.55               | 559            | 0.028             | 600            | 0.019             |
| <b>6</b> | 1          | 427        | 0.53               | 559            | 0.030             | 600            | 0.020             |
| <b>6</b> | 1.2        | 427        | 0.49               | 559            | 0.029             | 600            | 0.020             |
| <b>6</b> | 1.4        | 428        | 0.47               | 559            | 0.035             | 600            | 0.026             |

**Table 6.** Absorption studies of **6** in THF with 70% water at rt.

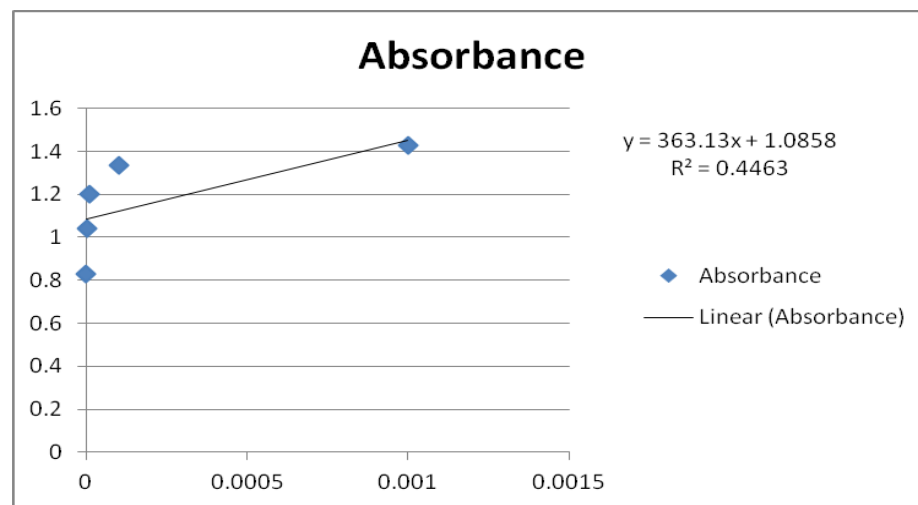

**Fig 2:** Beer-Lambert slope in different concentration ( $10^{-3}$ ,  $10^{-4}$ ,  $10^{-5}$ ,  $10^{-6}$  and  $10^{-7}$  M) in **1**

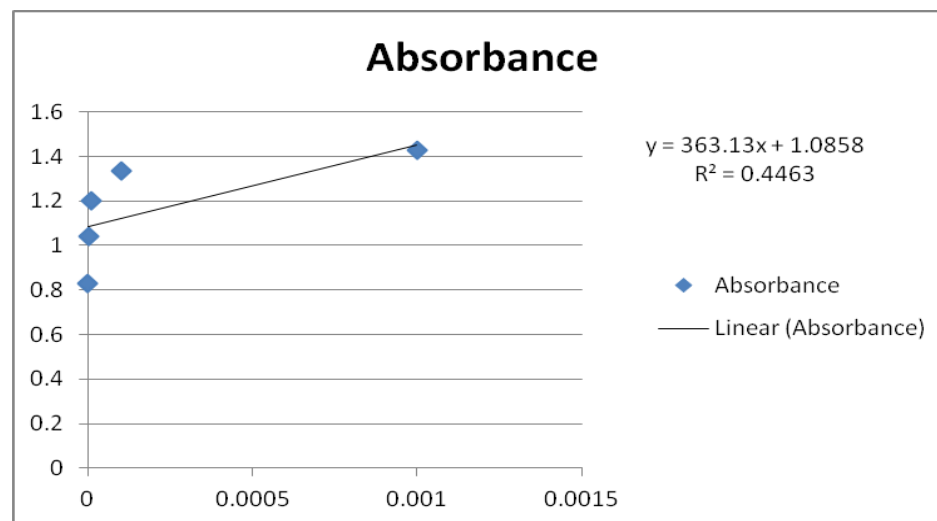

**Fig 3:** Beer-Lambert slope in different concentration ( $10^{-3}$ ,  $10^{-4}$ ,  $10^{-5}$ ,  $10^{-6}$  and  $10^{-7}$  M) in **2**

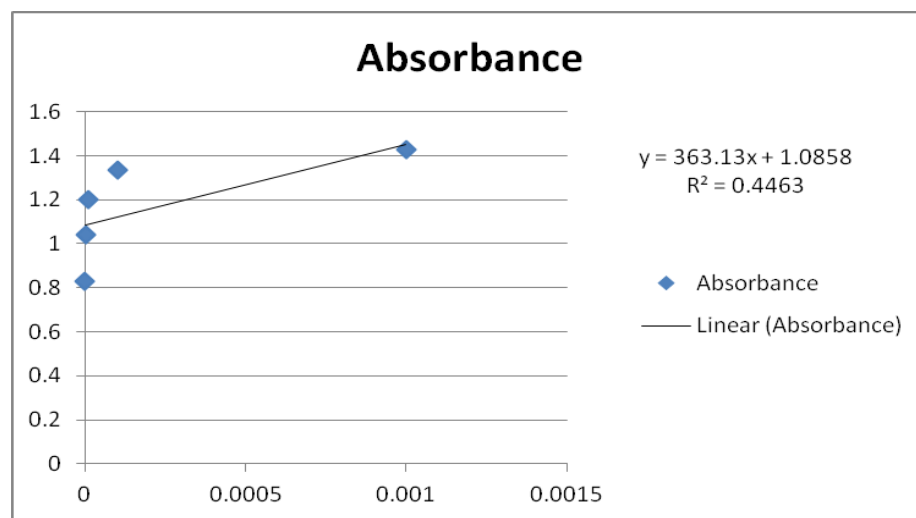

**Fig 4:** Beer-Lambert slope in different concentration ( $10^{-3}$ ,  $10^{-4}$ ,  $10^{-5}$ ,  $10^{-6}$  and  $10^{-7}$  M) in **3**

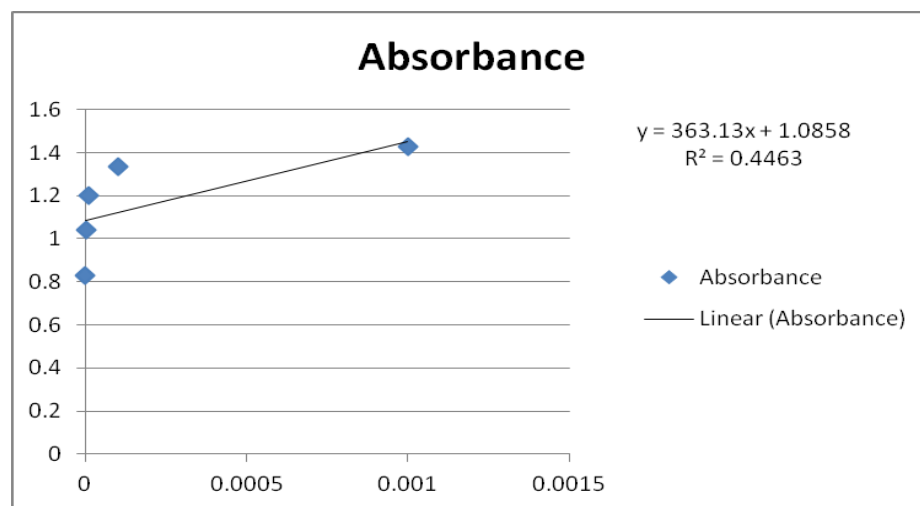

**Fig 5:** Beer-Lambert slope in different concentration ( $10^{-3}$ ,  $10^{-4}$ ,  $10^{-5}$ ,  $10^{-6}$  and  $10^{-7}$  M) in **4**

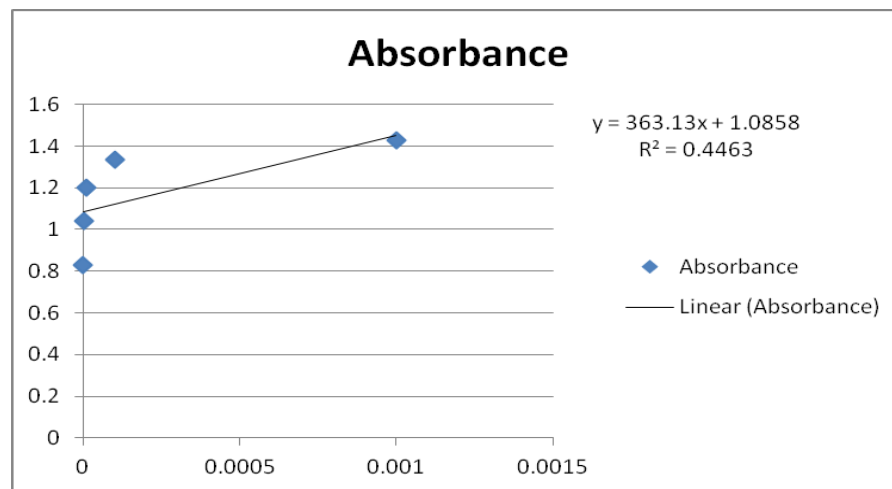

**Fig 6:** Beer-Lambert slope in different concentration ( $10^{-3}$ ,  $10^{-4}$ ,  $10^{-5}$ ,  $10^{-6}$  and  $10^{-7}$  M) in **5**

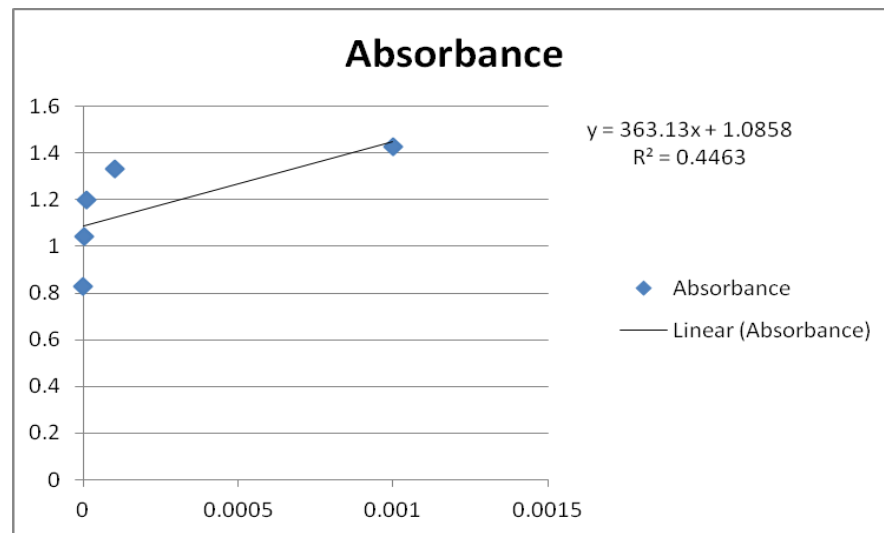

**Fig 7:** Beer-Lambert slope in different concentration ( $10^{-3}$ ,  $10^{-4}$ ,  $10^{-5}$ ,  $10^{-6}$  and  $10^{-7}$  M) in **6**
